# Supplementary material for: Is species richness driving intra- and interspecific interactions and temporal activity overlap of a hantavirus host? An experimental test
Source: PLoS One. 2017 Nov 15;12(11):e0188060. doi: 10.1371/journal.pone.0188060 (PMC5687724; doi:10.1371/journal.pone.0188060)
Supplement: S1 Dataset — (XLSX) [file pone.0188060.s003.xlsx]

## Sheet: Interactions of deermice
Number of intraspecific interactions of deermice						Number of interspecific interactions of deermice
Trial	Treatment	Interactions	Aggresive interactios			Trial	Treatment	Interactions
1	1	19	8			1	2	33
1	2	4	2			1	3	2
1	3	5	4			2	3	3
2	1	10	5			2	2	10
2	2	3	0			3	2	5
2	3	8	6			3	3	7
3	1	5	5			4	2	41
3	2	6	1			4	3	3
3	3	12	4			5	2	14
4	1	10	4			5	3	2
4	2	18	7			6	2	41
4	3	12	7			6	3	3
5	1	11	10
5	2	30	22
5	3	11	5
6	1	0	0
6	2	13	7
6	3	2	2

## Sheet: Diel activity
Late winter							Spring
Deermice T1	Deermice T2	Deermice T3	Kangarro rats	Grasshopper mice	Pocker mice		Deermice T1	Deermice T2	Deermice T3	Kangarro rats	Grasshopper mice	Pocker mice
23:59:00	18:46:00	19:07:00	19:03:00	22:15:00	19:13:00		23:59:00	20:44:00	21:35:00	23:15:00	21:46:00	00:08:00
23:58:00	18:46:00	19:09:00	19:03:00	22:41:00	00:12:00		23:59:00	20:55:00	22:28:00	00:36:00	20:31:00	00:37:00
23:58:00	18:48:00	19:12:00	19:10:00	21:39:00	19:07:00		23:59:00	22:07:00	23:16:00	02:41:00	21:54:00	01:30:00
23:58:00	18:50:00	21:48:00	19:15:00	21:27:00	19:24:00		23:57:00	23:13:00	23:52:00	03:00:00	21:59:00	05:58:00
23:57:00	18:53:00	22:21:00	19:26:00	05:22:00	19:41:00		23:57:00	00:10:00	00:05:00	03:34:00	22:57:00	03:57:00
23:55:00	19:03:00	22:24:00	19:31:00	02:24:00	20:59:00		23:57:00	01:01:00	00:19:00	04:05:00	20:15:00	04:29:00
23:55:00	19:03:00	22:44:00	19:33:00	19:05:00	22:36:00		23:56:00	01:23:00	00:50:00	04:10:00	21:15:00	04:33:00
23:54:00	19:04:00	23:29:00	19:39:00	05:30:00	22:40:00		23:55:00	01:47:00	01:20:00	04:38:00	21:47:00	05:30:00
23:54:00	23:32:00	23:56:00	19:56:00	05:32:00	23:10:00		23:53:00	01:56:00	01:34:00	05:12:00	22:58:00	05:33:00
23:53:00	00:12:00	01:01:00	20:06:00	04:18:00	23:13:00		23:52:00	02:41:00	02:51:00	05:31:00	01:31:00	00:24:00
23:53:00	19:04:00	02:27:00	20:55:00	04:21:00	00:02:00		23:52:00	04:37:00	03:03:00	20:38:00	03:22:00	03:07:00
23:53:00	19:06:00	02:30:00	21:17:00	05:00:00	22:10:00		23:51:00	23:01:00	04:58:00	20:58:00	23:05:00	22:53:00
23:53:00	19:09:00	02:44:00	21:32:00	05:43:00	22:15:00		23:50:00	23:06:00	20:16:00	21:22:00	02:27:00	04:10:00
23:53:00	19:10:00	03:01:00	23:48:00	19:06:00	22:21:00		23:50:00	23:29:00	23:41:00	22:29:00	21:12:00	22:09:00
23:52:00	19:11:00	03:17:00	00:06:00	19:14:00	22:50:00		23:49:00	00:11:00	00:08:00	22:39:00	23:31:00	23:38:00
23:51:00	19:21:00	04:01:00	18:45:00	19:15:00	22:55:00		23:49:00	01:23:00	01:27:00	22:52:00	21:42:00	23:49:00
23:50:00	19:22:00	04:19:00	18:49:00	19:28:00	22:57:00		23:48:00	01:39:00	05:04:00	23:08:00	23:59:00	00:36:00
23:50:00	19:51:00	04:25:00	18:51:00	23:46:00	22:57:00		23:48:00	01:43:00	22:15:00	23:11:00	01:33:00	22:09:00
23:48:00	20:43:00	05:28:00	18:57:00	00:18:00	00:14:00		23:47:00	01:45:00	01:04:00	23:29:00	21:21:00	22:52:00
23:48:00	21:36:00	05:41:00	19:08:00	05:18:00	00:16:00		23:46:00	01:47:00	03:53:00	23:37:00	22:26:00	23:19:00
23:45:00	21:38:00	18:44:00	19:16:00	04:34:00	00:18:00		23:45:00	02:20:00	05:39:00	00:39:00	21:20:00	05:11:00
23:45:00	21:39:00	18:48:00	19:25:00	03:01:00	20:54:00		23:45:00	02:46:00	05:43:00	00:41:00	02:28:00	22:44:00
23:43:00	21:43:00	18:55:00	19:27:00	02:43:00	23:23:00		23:45:00	03:22:00	20:50:00	01:29:00	03:30:00	23:07:00
23:42:00	21:56:00	19:02:00	19:43:00	03:56:00	22:16:00		23:45:00	03:59:00	22:22:00	01:50:00	04:55:00	05:32:00
23:42:00	21:59:00	19:03:00	19:56:00	03:57:00	22:17:00		23:45:00	04:02:00	22:27:00	02:56:00	05:04:00	21:05:00
23:41:00	22:30:00	19:11:00	20:07:00	04:34:00	00:00:00		23:45:00	05:12:00	22:32:00	03:25:00	00:37:00	22:07:00
23:41:00	23:30:00	20:22:00	20:16:00	19:45:00	21:24:00		23:45:00	05:19:00	23:07:00	04:31:00	01:23:00	05:14:00
23:40:00	00:28:00	21:35:00	20:31:00	01:39:00	22:50:00		23:43:00	05:23:00	23:46:00	04:35:00	21:58:00	22:59:00
23:40:00	01:41:00	21:40:00	20:39:00	02:16:00	23:53:00		23:43:00	05:24:00	01:36:00	04:59:00	23:49:00	04:56:00
23:39:00	05:30:00	21:58:00	20:52:00	02:34:00	03:06:00		23:43:00	05:39:00	02:22:00	05:07:00	00:18:00	05:13:00
23:39:00	19:26:00	22:30:00	21:15:00	03:18:00	03:36:00		23:42:00	20:26:00	02:57:00	21:22:00	03:41:00	05:23:00
23:39:00	21:20:00	22:32:00	21:23:00	04:21:00	20:43:00		23:42:00	20:42:00	03:48:00	23:08:00	21:32:00	05:49:00
23:37:00	21:33:00	23:33:00	21:49:00	02:45:00	05:35:00		23:41:00	22:12:00	04:12:00	00:04:00	23:02:00	22:17:00
23:36:00	00:14:00	01:41:00	22:17:00	02:42:00	05:43:00		23:41:00	00:50:00	04:50:00	00:39:00	01:06:00	20:55:00
23:36:00	00:40:00	01:47:00	22:45:00	02:45:00	18:56:00		23:41:00	01:11:00	04:56:00	00:57:00	01:28:00	01:26:00
23:36:00	01:13:00	04:09:00	23:39:00	00:07:00	19:04:00		23:40:00	01:23:00	05:07:00	01:08:00	02:02:00	05:24:00
23:36:00	18:58:00	22:57:00	23:57:00	01:29:00	19:06:00		23:40:00	01:33:00	05:10:00	01:28:00	03:34:00	22:37:00
23:35:00	22:02:00	00:43:00	18:36:00	03:24:00	01:12:00		23:40:00	02:36:00	05:15:00	01:31:00	23:08:00	22:56:00
23:35:00	23:04:00	18:51:00	18:47:00	01:24:00	02:58:00		23:40:00	02:40:00	05:29:00	01:34:00	02:08:00	00:23:00
23:34:00	00:09:00	21:26:00	18:49:00	04:15:00	04:29:00		23:39:00	02:43:00	05:32:00	01:53:00	20:28:00	22:03:00
23:33:00	00:10:00	23:00:00	12:51:00	05:32:00	05:32:00		23:39:00	03:06:00	05:51:00	02:22:00	02:23:00	05:44:00
23:33:00	01:51:00	00:41:00	18:52:00	05:02:00	05:50:00		23:39:00	03:38:00	01:57:00	02:48:00	03:59:00	21:21:00
23:32:00	01:59:00	02:15:00	18:59:00	01:24:00	19:14:00		23:38:00	03:40:00	02:52:00	03:52:00	02:47:00	22:31:00
23:31:00	02:39:00	05:24:00	19:05:00	02:38:00	20:04:00		23:36:00	04:02:00	04:21:00	04:08:00	05:02:00	01:58:00
23:31:00	03:59:00	05:27:00	19:07:00	04:00:00	20:31:00		23:36:00	04:16:00	21:17:00	04:20:00	21:20:00	04:20:00
23:30:00	04:36:00	19:02:00	19:09:00	04:07:00	01:38:00		23:36:00	04:25:00	22:15:00	04:30:00	01:37:00	05:14:00
23:30:00	04:51:00	21:34:00	19:22:00	04:23:00	02:58:00		23:34:00	04:49:00	01:01:00	04:37:00	20:17:00	21:36:00
23:29:00	04:59:00	21:37:00	20:00:00	04:46:00	05:48:00		23:31:00	04:40:00	02:10:00	04:43:00	02:19:00	23:00:00
23:28:00	19:55:00	03:16:00	20:18:00	00:46:00	22:44:00		23:31:00	05:09:00	04:12:00	05:38:00	20:37:00	03:11:00
23:28:00	22:15:00	05:16:00	20:30:00	04:50:00	22:48:00		23:30:00	05:10:00	05:02:00	05:50:00	01:04:00	04:18:00
23:28:00	21:34:00	23:00:00	21:26:00	02:39:00	02:09:00		23:30:00	05:25:00	21:06:00	05:52:00	23:21:00	04:44:00
23:26:00	00:44:00	18:58:00	21:47:00	03:10:00	03:10:00		23:30:00	05:34:00	22:49:00	02:28:00	01:08:00	05:10:00
23:26:00	01:54:00	19:07:00	22:03:00	03:22:00	03:16:00		23:30:00	23:05:00	23:03:00	02:59:00	02:14:00	05:16:00
23:24:00	18:52:00	00:27:00	22:28:00	04:07:00	03:20:00		23:29:00	01:55:00	23:26:00	04:51:00	02:22:00	05:42:00
23:23:00	19:18:00	00:42:00	23:44:00	03:50:00	03:21:00		23:29:00	02:27:00	23:33:00	04:57:00	02:26:00	21:17:00
23:23:00	22:02:00	01:03:00	00:16:00	03:56:00	03:23:00		23:27:00	02:55:00	00:20:00	05:14:00	03:33:00	01:22:00
23:20:00	22:33:00	01:22:00	00:46:00	03:59:00	03:28:00		23:25:00	02:59:00	00:41:00	05:19:00	04:03:00	04:17:00
23:19:00	23:01:00	02:16:00	01:05:00	04:30:00	03:52:00		23:24:00	03:00:00	01:16:00	05:21:00	04:16:00	12:19:00
23:19:00	19:01:00	03:34:00	01:20:00	19:18:00	04:50:00		23:23:00	03:39:00	02:08:00	05:29:00	05:23:00	01:10:00
23:19:00	19:16:00	03:45:00	18:37:00	22:29:00	05:39:00		23:21:00	03:44:00	02:59:00	05:36:00	21:32:00	22:38:00
23:19:00	20:42:00	04:13:00	18:42:00	22:30:00	01:14:00		23:21:00	04:42:00	03:57:00	05:40:00	00:09:00	21:54:00
23:18:00	19:15:00	04:46:00	19:04:00	00:02:00	01:35:00		23:20:00	04:48:00	04:30:00	06:14:00	00:14:00	05:15:00
23:18:00	19:35:00	18:48:00	19:15:00	00:33:00	22:58:00		23:18:00	04:51:00	05:33:00	20:44:00	01:07:00	23:10:00
23:18:00	19:41:00	18:57:00	19:29:00	02:26:00	22:29:00		23:18:00	05:34:00	22:00:00	00:28:00	21:25:00	00:56:00
23:17:00	21:10:00	19:18:00	19:35:00	03:32:00	03:56:00		23:18:00	05:36:00	20:02:00	02:20:00	05:42:00	02:11:00
23:17:00	21:11:00	04:13:00	20:10:00	03:44:00	03:56:00		23:16:00	05:40:00	22:24:00	03:42:00	22:32:00	02:20:00
23:17:00	21:44:00	04:24:00	20:31:00	04:27:00	04:46:00		23:15:00	05:44:00	23:08:00	03:56:00	22:39:00	04:18:00
23:16:00	22:20:00	05:10:00	20:46:00	05:22:00	05:12:00		23:15:00	20:25:00	23:24:00	04:33:00	00:25:00	01:32:00
23:15:00	01:51:00	05:19:00	21:38:00	20:26:00	05:33:00		23:14:00	22:21:00	23:29:00	05:25:00	02:29:00	03:48:00
23:14:00	02:37:00	00:31:00	21:45:00	20:29:00	18:53:00		23:13:00	23:29:00	23:47:00	05:39:00	04:42:00	04:53:00
23:14:00	02:53:00	03:44:00	23:08:00	20:32:00	19:02:00		23:12:00	00:13:00	00:41:00	05:58:00	02:34:00	05:44:00
23:14:00	18:57:00	04:05:00	23:35:00	20:34:00	02:00:00		23:12:00	00:35:00	01:39:00	20:31:00	00:56:00	20:56:00
23:13:00	19:46:00	04:32:00	00:42:00	20:36:00	05:10:00		23:10:00	02:46:00	03:40:00	20:41:00	02:16:00	05:47:00
23:13:00	19:48:00	02:05:00	01:49:00	20:38:00	23:42:00		23:09:00	03:56:00	03:42:00	21:51:00	04:29:00	01:50:00
23:12:00	19:54:00	02:22:00	18:45:00	21:51:00	01:42:00		23:09:00	04:22:00	04:54:00	21:57:00	21:50:00	04:02:00
23:12:00	21:11:00	02:42:00	18:54:00	20:52:00	04:15:00		23:08:00	04:36:00	05:25:00	23:32:00	01:25:00	04:45:00
23:11:00	21:19:00	02:45:00	18:57:00	19:05:00	04:47:00		23:07:00	04:41:00	05:29:00	01:12:00	03:37:00	20:24:00
23:11:00	22:38:00	02:49:00	19:02:00	02:44:00	04:52:00		23:07:00	04:59:00	20:21:00	02:07:00	22:28:00	22:52:00
23:10:00	01:14:00	03:38:00	19:14:00	05:09:00	19:17:00		23:07:00	05:38:00	20:25:00	02:15:00	22:47:00	23:17:00
23:10:00	03:43:00	03:57:00	19:32:00	02:54:00	04:53:00		23:07:00	05:39:00	21:28:00	02:43:00	03:03:00	23:36:00
23:08:00	18:57:00	04:01:00	19:43:00	19:11:00	20:25:00		23:06:00	20:44:00	21:38:00	03:00:00	05:14:00	05:37:00
23:08:00	20:36:00	04:08:00	19:48:00	19:14:00	02:56:00		23:04:00	22:50:00	21:47:00	03:19:00	02:44:00	20:27:00
23:07:00	22:30:00	04:11:00	19:50:00	19:16:00	04:46:00		23:04:00	00:51:00	22:24:00	00:33:00	23:56:00	04:59:00
23:07:00	01:50:00	04:34:00	19:56:00	20:01:00	03:52:00		23:04:00	00:58:00	00:51:00	03:37:00	03:41:00	03:11:00
23:07:00	02:12:00	04:38:00	20:09:00	19:48:00	04:50:00		23:03:00	01:01:00	03:31:00	03:47:00	04:20:00	04:04:00
23:06:00	02:24:00	04:55:00	21:05:00	04:10:00	04:56:00		23:03:00	01:03:00	03:37:00	04:05:00	00:09:00	20:31:00
23:05:00	03:59:00	05:01:00	21:28:00	04:23:00	05:30:00		23:02:00	01:32:00	03:42:00	04:32:00	20:45:00	21:30:00
23:05:00	05:05:00	05:06:00	22:13:00	21:59:00	23:34:00		23:00:00	02:46:00	04:26:00	04:41:00	00:11:00	22:32:00
23:04:00	19:04:00	05:11:00	22:16:00	22:12:00	00:06:00		23:00:00	03:55:00	04:57:00	04:43:00	02:21:00	05:58:00
23:04:00	22:20:00	18:57:00	23:33:00	01:18:00	04:01:00		22:58:00	04:23:00	05:17:00	04:57:00	01:45:00	20:42:00
23:03:00	23:33:00	19:07:00	00:01:00	20:33:00	05:41:00		22:58:00	01:01:00	05:24:00	05:00:00	02:41:00	01:19:00
23:03:00	00:13:00	22:07:00	00:18:00	21:39:00	23:24:00		22:56:00	01:33:00	05:31:00	05:18:00	03:11:00	05:13:00
23:02:00	01:56:00	22:09:00	01:04:00	05:33:00	03:04:00		22:56:00	04:27:00	01:08:00	05:33:00	01:16:00	21:33:00
23:01:00	02:10:00	22:57:00	01:30:00	22:52:00	03:11:00		22:55:00	05:29:00	21:19:00	05:36:00	01:18:00	23:03:00
23:00:00	04:12:00	02:36:00	01:44:00	02:26:00	03:36:00		22:54:00	05:29:00	23:02:00	23:43:00	04:09:00	00:39:00
23:00:00	05:19:00	02:45:00	04:37:00	19:59:00	03:46:00		22:52:00	20:23:00	23:06:00	01:05:00	02:48:00	05:22:00
22:59:00	20:01:00	05:44:00	05:33:00	20:37:00	05:45:00		22:50:00	21:27:00	01:01:00	01:39:00	00:38:00	20:40:00
22:58:00	20:26:00	05:51:00	18:48:00	22:33:00	05:50:00		22:49:00	21:43:00	01:12:00	01:57:00	23:51:00	21:26:00
22:52:00	21:17:00	05:57:00	18:50:00	22:56:00	19:02:00		22:48:00	22:01:00	01:49:00	01:59:00	01:12:00	04:24:00
22:51:00	22:23:00	18:51:00	19:03:00	04:45:00	03:05:00		22:48:00	22:59:00	02:09:00	02:54:00	01:27:00	20:44:00
22:51:00	23:58:00	19:00:00	19:05:00	22:49:00	03:07:00		22:47:00	23:35:00	02:56:00	02:58:00	01:49:00	21:24:00
22:50:00	00:19:00	00:15:00	19:16:00	00:49:00	03:09:00		22:47:00	02:05:00	02:58:00	03:15:00	00:19:00	00:35:00
22:49:00	05:13:00	00:22:00	19:18:00	04:50:00	05:00:00		22:47:00	02:56:00	03:29:00	03:40:00	01:56:00	03:37:00
22:48:00	05:47:00	00:47:00	20:00:00	05:39:00	03:01:00		22:46:00	04:31:00	04:32:00	03:52:00	04:11:00	00:26:00
22:46:00	19:07:00	01:01:00	20:25:00	05:07:00	05:50:00		22:45:00	04:35:00	05:23:00	04:23:00	03:12:00	00:49:00
22:44:00	22:02:00	01:42:00	20:32:00	22:10:00	05:15:00		22:45:00	22:07:00	01:35:00	04:26:00	04:23:00	01:58:00
22:43:00	23:01:00	02:27:00	20:56:00	20:47:00	05:43:00		22:43:00	22:19:00	01:53:00	04:39:00	04:31:00	05:25:00
22:42:00	23:01:00	02:53:00	21:02:00	19:07:00	18:53:00		22:43:00	01:29:00	02:05:00	05:16:00	05:23:00	23:06:00
22:42:00	22:02:00	03:18:00	21:12:00	19:23:00	19:07:00		22:43:00	02:17:00	03:30:00	05:29:00	05:43:00	20:30:00
22:38:00	01:02:00	04:55:00	21:41:00	21:26:00	05:36:00		22:43:00	05:48:00	04:29:00	05:41:00	01:12:00	21:09:00
22:38:00	01:04:00	02:57:00	22:50:00	22:02:00	04:48:00		22:43:00	20:44:00	05:29:00	05:51:00	03:28:00	20:37:00
22:37:00	03:03:00	02:58:00	23:33:00	19:53:00	05:32:00		22:42:00	20:45:00	22:17:00	00:25:00	01:18:00	21:10:00
22:36:00	03:08:00	03:00:00	23:58:00	22:35:00	05:35:00		22:42:00	21:20:00	02:56:00	04:06:00	04:44:00	23:42:00
22:34:00	03:32:00	03:03:00	00:08:00	22:53:00	05:37:00		22:41:00	21:30:00	05:15:00	04:56:00	23:07:00	02:53:00
22:32:00	03:52:00	03:29:00	00:15:00	23:56:00	05:39:00		22:40:00	22:23:00	20:25:00	04:59:00	04:02:00	05:28:00
22:31:00	05:59:00	03:46:00	00:19:00	05:31:00	05:59:00		22:39:00	23:15:00	22:34:00	05:03:00	04:52:00	20:27:00
22:31:00	18:53:00	03:51:00	00:30:00	05:32:00	18:49:00		22:38:00	23:16:00	00:12:00	05:19:00	04:54:00	21:20:00
22:30:00	18:57:00	05:21:00	00:44:00	20:48:00	04:50:00		22:38:00	00:08:00	00:43:00	05:27:00	04:29:00	23:15:00
22:30:00	19:04:00	01:39:00	00:59:00	22:24:00	05:54:00		22:38:00	00:15:00	01:29:00	05:37:00	02:53:00	01:39:00
22:29:00	19:06:00	02:10:00	01:05:00	22:26:00	01:32:00		22:37:00	02:13:00	01:48:00	05:40:00	03:35:00	20:26:00
22:28:00	01:54:00	02:12:00	18:55:00	23:04:00	03:23:00		22:36:00	02:19:00	03:45:00	20:27:00	03:39:00	21:19:00
22:28:00	02:24:00	03:28:00	19:33:00	23:06:00	05:39:00		22:34:00	03:03:00	04:32:00	20:52:00	23:10:00	05:42:00
22:27:00	03:12:00	03:32:00	20:11:00	00:03:00	19:11:00		22:33:00	03:54:00	05:14:00	21:16:00	05:03:00	05:44:00
22:25:00	03:14:00	04:01:00	20:07:00	21:32:00	20:06:00		22:32:00	04:18:00	05:36:00	21:33:00	05:10:00	02:13:00
22:23:00	03:15:00	04:09:00	21:51:00	05:39:00	20:12:00		22:30:00	04:39:00	05:38:00	21:40:00	05:34:00	21:14:00
22:21:00	03:21:00	04:18:00	18:50:00	20:56:00	20:51:00		22:30:00	04:53:00	22:26:00	21:45:00	20:33:00	03:15:00
22:20:00	03:56:00	04:23:00	18:55:00	22:52:00	20:56:00		22:28:00	05:29:00	04:52:00	21:49:00	04:26:00	22:54:00
22:19:00	04:41:00	04:39:00	19:08:00	23:02:00	20:56:00		22:28:00	05:35:00	05:10:00	22:00:00	01:23:00	22:59:00
22:18:00	21:36:00	04:59:00	19:31:00	02:08:00	03:39:00		22:27:00	05:48:00	05:41:00	22:04:00	00:51:00	04:12:00
22:18:00	02:36:00	05:07:00	20:18:00	04:39:00	03:41:00		22:26:00	22:53:00	20:38:00	22:20:00	01:29:00	04:44:00
22:16:00	03:34:00	05:25:00	20:48:00	04:40:00	20:26:00		22:25:00	23:36:00	21:07:00	22:35:00	02:28:00	21:31:00
22:16:00	03:44:00	05:27:00	20:52:00	04:47:00	04:17:00		22:25:00	00:26:00	23:55:00	23:08:00	03:01:00	00:29:00
22:15:00	04:41:00	05:32:00	21:06:00	05:18:00	05:02:00		22:25:00	00:46:00	00:13:00	23:11:00	04:13:00	20:58:00
22:12:00	05:34:00	18:55:00	21:20:00	05:25:00	18:53:00		22:24:00	02:05:00	00:50:00	23:17:00	05:10:00	01:05:00
22:12:00	19:10:00	19:00:00	21:27:00	19:20:00	10:01:00		22:23:00	02:19:00	00:59:00	23:28:00	23:49:00	06:00:00
22:10:00	19:13:00	19:08:00	22:04:00	19:09:00	19:49:00		22:22:00	02:54:00	01:16:00	23:55:00	00:30:00	00:36:00
22:10:00	19:23:00	19:46:00	22:38:00	19:55:00	05:16:00		22:17:00	05:31:00	01:33:00	00:23:00	02:23:00	04:16:00
22:09:00	23:57:00	00:19:00	05:43:00	20:16:00	19:11:00		22:16:00	05:42:00	02:29:00	01:04:00	22:56:00	20:28:00
22:08:00	01:30:00	00:33:00	18:44:00	22:54:00	19:33:00		22:15:00	05:44:00	03:09:00	01:06:00	01:05:00	02:40:00
22:08:00	02:50:00	02:05:00	18:53:00	00:44:00	19:39:00		22:15:00	05:46:00	03:16:00	01:37:00	01:07:00	04:38:00
22:08:00	02:24:00	02:18:00	19:41:00	00:55:00	19:41:00		22:14:00	21:04:00	04:28:00	01:56:00	05:12:00	03:59:00
22:07:00	02:38:00	02:32:00	19:54:00	02:21:00	19:43:00		22:11:00	23:22:00	04:53:00	01:58:00	03:27:00	02:33:00
22:06:00	02:50:00	03:06:00	20:14:00	20:40:00	19:45:00		22:10:00	23:25:00	04:55:00	02:28:00	03:43:00	04:17:00
22:06:00	03:16:00	19:07:00	21:11:00	22:11:00	19:47:00		22:09:00	00:02:00	05:00:00	02:33:00	04:48:00	04:34:00
22:05:00	04:29:00	01:01:00	21:45:00	05:28:00	20:01:00		22:08:00	00:17:00	05:04:00	02:40:00	05:27:00	05:29:00
22:04:00	04:57:00	02:42:00	22:58:00	19:25:00	20:43:00		22:08:00	01:52:00	05:26:00	02:47:00	05:41:00	05:32:00
22:04:00	05:35:00	02:47:00	00:16:00	21:53:00	05:50:00		22:06:00	01:57:00	05:38:00	02:55:00	04:16:00	03:25:00
22:02:00	19:07:00	03:05:00	02:26:00	22:07:00	05:50:00		22:05:00	03:57:00	22:34:00	03:10:00	05:28:00	21:56:00
22:02:00	20:15:00	03:28:00	02:49:00	00:01:00	19:54:00		22:04:00	04:45:00	03:49:00	03:52:00	05:33:00	02:04:00
22:01:00	01:27:00	03:39:00	03:04:00	00:24:00	05:10:00		22:03:00	05:07:00	04:14:00	03:56:00	04:29:00	04:08:00
21:57:00	01:47:00	01:22:00	03:40:00	19:31:00	05:18:00		22:03:00	00:08:00	05:59:00	03:59:00	05:59:00	05:21:00
21:55:00	01:48:00	02:29:00	04:24:00	00:10:00	19:12:00		22:02:00	00:10:00	21:42:00	04:27:00	05:00:00	05:20:00
21:54:00	02:16:00	03:16:00	18:49:00	03:01:00	19:47:00		22:02:00	00:17:00	22:00:00	04:36:00	05:30:00	03:49:00
21:54:00	02:18:00	04:16:00	18:53:00	03:09:00	19:57:00		22:00:00	03:49:00	22:24:00	04:42:00	05:37:00	04:01:00
21:53:00	02:38:00	04:50:00	18:57:00	22:09:00	19:59:00		21:59:00	04:29:00	00:19:00	05:08:00	23:41:00	05:21:00
21:53:00	02:40:00	02:44:00	19:02:00	00:38:00	20:00:00		21:58:00	04:30:00	00:51:00	05:23:00	20:49:00	04:03:00
21:53:00	02:54:00	03:19:00	19:25:00	19:16:00	21:48:00		21:57:00	05:19:00	01:42:00	05:29:00	04:59:00	00:56:00
21:53:00	02:55:00	23:23:00	19:29:00	19:30:00	04:25:00		21:57:00	05:49:00	02:18:00	05:45:00	05:15:00	03:54:00
21:53:00	03:00:00	03:19:00	19:54:00	21:28:00	20:25:00		21:55:00	20:25:00	03:43:00	05:47:00	20:55:00	05:23:00
21:53:00	03:12:00	04:24:00	20:11:00	19:28:00	20:34:00		21:55:00	21:17:00	04:30:00	20:44:00	01:45:00	00:34:00
21:53:00	04:49:00	05:17:00	20:58:00	19:03:00	21:12:00		21:54:00	21:34:00	04:40:00	21:39:00	04:23:00	00:57:00
21:51:00	02:13:00	05:27:00	03:55:00	19:24:00	21:19:00		21:54:00	22:52:00	04:59:00	21:54:00	05:30:00	02:05:00
21:51:00	02:33:00	23:42:00	19:03:00	19:53:00	04:52:00		21:52:00	23:32:00	05:31:00	22:59:00	21:55:00	03:42:00
21:51:00	03:12:00	00:59:00	19:16:00	19:55:00	05:43:00		21:51:00	00:51:00	05:33:00	23:04:00	03:26:00	04:24:00
21:49:00	03:25:00	01:01:00	19:55:00	20:03:00	20:29:00		21:51:00	02:00:00	20:41:00	23:06:00	04:04:00	02:23:00
21:49:00	03:30:00	01:02:00	20:36:00	20:10:00	20:27:00		21:50:00	03:02:00	21:31:00	23:15:00	04:32:00	02:30:00
21:48:00	03:56:00	01:24:00	22:51:00	20:22:00	21:12:00		21:48:00	03:07:00	22:10:00	02:39:00	05:20:00	00:59:00
21:48:00	04:06:00	01:43:00	00:08:00	00:07:00	21:15:00		21:46:00	03:27:00	23:30:00	05:12:00	05:21:00	02:23:00
21:48:00	05:53:00	02:27:00	00:40:00	05:12:00	05:33:00		21:46:00	03:51:00	02:49:00	20:58:00	01:26:00	02:23:00
21:48:00	02:33:00	03:20:00	01:01:00	21:06:00	05:36:00		21:46:00	04:26:00	03:13:00	22:15:00	02:48:00	02:48:00
21:47:00	03:06:00	04:24:00	02:08:00	21:55:00	21:50:00		21:45:00	04:35:00	04:01:00	00:19:00	03:30:00	04:04:00
21:45:00	03:19:00	05:37:00	02:36:00	22:47:00	21:37:00		21:45:00	04:52:00	05:01:00	01:41:00	04:35:00	00:34:00
21:42:00	03:39:00	05:37:00	03:35:00	22:50:00	01:29:00		21:45:00	05:07:00	05:17:00	02:18:00	04:52:00	02:39:00
21:42:00	03:59:00	19:00:00	04:13:00	19:29:00	19:18:00		21:44:00	05:39:00	23:05:00	03:30:00	05:14:00	03:59:00
21:42:00	04:16:00	19:38:00	04:16:00	20:14:00	20:00:00		21:43:00	06:08:00	04:49:00	04:17:00	05:17:00	05:41:00
21:41:00	04:35:00	23:25:00	05:56:00	21:08:00	05:16:00		21:43:00	20:42:00	21:21:00	05:31:00	05:27:00	23:11:00
21:39:00	04:44:00	23:27:00	18:40:00	21:56:00	05:49:00		21:42:00	20:52:00	23:10:00	05:36:00	01:55:00	00:03:00
21:38:00	03:26:00	01:20:00	18:48:00	02:55:00	19:04:00		21:42:00	21:01:00	01:05:00	05:44:00	05:14:00	05:21:00
21:37:00	04:14:00	02:28:00	19:12:00	19:40:00	02:11:00		21:42:00	21:34:00	02:26:00	20:48:00	05:16:00	01:07:00
21:35:00	01:43:00	03:56:00	19:35:00	19:56:00	02:13:00		21:42:00	23:48:00	03:53:00	21:35:00	05:29:00	01:08:00
21:34:00	02:48:00	03:58:00	20:16:00	20:07:00	05:25:00		21:41:00	23:50:00	04:58:00	22:06:00	03:27:00	02:58:00
21:32:00	02:53:00	04:31:00	20:45:00	19:41:00	21:32:00		21:41:00	23:51:00	05:29:00	22:32:00	03:43:00	03:06:00
21:32:00	03:10:00	04:37:00	21:27:00	19:50:00	21:36:00		21:40:00	02:16:00	20:38:00	22:40:00	04:48:00	02:55:00
21:32:00	03:39:00	05:02:00	21:39:00	22:19:00	22:48:00		21:38:00	04:03:00	21:50:00	23:54:00	05:27:00	03:14:00
21:32:00	04:01:00	05:09:00	22:19:00	02:36:00	20:34:00		21:36:00	04:36:00	03:25:00	01:07:00	05:41:00	05:41:00
21:30:00	04:27:00	05:55:00	22:25:00	01:32:00	22:43:00		21:32:00	05:20:00	03:44:00	01:40:00	04:16:00	02:50:00
21:30:00	04:40:00	00:19:00	22:57:00	04:11:00	23:41:00		21:30:00	05:21:00	21:17:00	02:55:00	05:28:00	05:30:00
21:29:00	04:42:00	01:52:00	23:02:00	20:42:00	20:10:00		21:29:00	05:23:00	23:41:00	04:05:00	05:33:00	04:13:00
21:29:00	04:49:00	03:13:00	23:39:00	02:20:00	20:23:00		21:29:00	05:24:00	00:20:00	04:26:00	04:29:00	04:13:00
21:29:00	05:14:00	04:31:00	00:26:00	02:21:00	21:25:00		21:29:00	05:37:00	01:10:00	04:44:00	05:59:00	05:30:00
21:27:00	18:57:00	04:33:00	00:49:00	05:22:00	21:27:00		21:27:00	20:21:00	01:14:00	05:10:00	05:00:00	05:45:00
21:27:00	18:59:00	04:44:00	01:06:00	19:57:00	19:34:00		21:26:00	20:30:00	01:19:00	06:01:00	05:30:00	02:34:00
21:27:00	19:03:00	04:59:00	02:45:00	20:19:00	20:10:00		21:24:00	20:59:00	01:49:00	20:33:00	05:37:00	04:07:00
21:26:00	19:07:00	02:24:00	03:49:00	19:47:00	20:22:00		21:24:00	23:22:00	02:57:00	20:41:00	23:41:00	03:57:00
21:25:00	19:17:00	02:38:00	04:00:00	01:15:00	20:27:00		21:24:00	00:23:00	04:33:00	00:13:00	20:49:00	05:07:00
21:25:00	00:13:00	02:53:00	04:18:00	21:47:00	21:19:00		21:23:00	00:34:00	04:37:00	00:25:00	04:59:00	05:08:00
21:24:00	02:10:00	03:00:00	04:40:00	00:20:00	05:39:00		21:23:00	02:57:00	04:43:00	00:44:00	05:15:00	04:11:00
21:23:00	02:13:00	03:06:00	05:11:00	00:26:00	19:16:00		21:22:00	05:57:00	04:45:00	01:07:00	20:55:00	02:35:00
21:22:00	03:07:00	03:29:00	05:45:00	02:57:00	19:18:00		21:22:00	02:12:00	22:08:00	01:34:00	01:45:00	05:09:00
21:22:00	03:23:00	03:51:00	18:44:00	19:35:00	20:27:00		21:22:00	22:22:00	22:25:00	01:46:00	04:23:00	21:25:00
21:21:00	03:26:00	04:24:00	19:30:00	20:57:00	03:12:00		21:22:00	22:41:00	22:57:00	01:49:00	05:30:00	02:41:00
21:21:00	03:33:00	04:37:00	19:40:00	21:28:00	19:18:00		21:21:00	23:07:00	23:32:00	03:05:00	21:55:00	04:40:00
21:21:00	03:48:00	04:47:00	20:40:00	23:13:00	22:49:00		21:21:00	23:17:00	00:37:00	05:30:00	03:26:00
21:19:00	04:04:00	04:56:00	20:44:00	04:40:00	02:18:00		21:20:00	03:48:00	00:56:00	05:57:00	04:04:00
21:19:00	04:15:00	05:29:00	21:35:00	21:39:00	02:30:00		21:20:00	04:14:00	01:06:00	20:16:00	04:32:00
21:17:00	04:50:00	19:01:00	00:06:00	23:14:00	02:51:00		21:19:00	04:31:00	01:21:00	01:18:00	05:20:00
21:17:00	05:29:00	21:03:00	03:59:00	00:24:00	19:25:00		21:19:00	04:55:00	01:40:00	03:28:00	05:21:00
21:14:00	05:38:00	21:23:00	04:24:00	03:47:00	21:55:00		21:18:00	05:31:00	01:44:00	03:47:00	01:26:00
21:11:00	18:55:00	23:47:00	05:00:00	21:50:00	22:49:00		21:18:00	21:36:00	02:03:00	04:11:00	02:48:00
21:10:00	18:57:00	00:48:00	05:35:00	04:30:00	21:56:00		21:17:00	23:00:00	02:54:00	05:31:00	03:30:00
21:10:00	19:03:00	01:12:00	05:58:00	22:59:00	03:02:00		21:15:00	03:16:00	03:44:00	05:42:00	04:35:00
21:08:00	19:07:00	01:21:00	18:55:00	04:48:00	00:32:00		21:13:00	04:30:00	04:38:00	05:57:00	04:52:00
21:08:00	19:08:00	02:13:00	19:21:00	23:07:00	03:35:00		21:12:00	05:41:00	04:47:00	06:12:00	05:14:00
21:08:00	20:10:00	02:16:00	19:31:00	02:05:00	05:37:00		21:11:00	05:43:00	22:16:00	21:08:00	05:17:00
21:07:00	02:03:00	02:50:00	19:45:00	19:26:00	19:30:00		21:10:00	20:27:00	00:22:00	22:04:00	05:27:00
21:07:00	02:24:00	02:51:00	20:16:00	22:15:00	21:32:00		21:10:00	22:10:00	01:06:00	22:29:00	01:55:00
21:06:00	03:05:00	03:21:00	20:19:00	19:15:00	22:33:00		21:10:00	00:19:00	01:22:00	22:42:00	05:14:00
21:06:00	03:30:00	03:23:00	20:23:00	21:58:00	20:11:00		21:08:00	01:12:00	03:25:00	23:19:00	05:16:00
21:06:00	04:15:00	05:13:00	20:57:00	23:17:00	21:29:00		21:08:00	02:29:00	04:06:00	00:18:00	05:29:00
21:05:00	04:57:00	05:19:00	21:44:00	01:57:00	22:25:00		21:06:00	03:19:00	04:13:00	00:31:00
21:05:00	19:12:00	05:20:00	00:05:00	19:35:00	00:32:00		21:06:00	20:42:00	04:41:00	00:58:00
21:05:00	19:44:00	05:22:00	00:10:00	22:26:00	05:21:00		21:06:00	21:43:00	05:15:00	04:07:00
21:04:00	20:58:00	19:37:00	00:17:00	23:19:00	05:07:00		21:04:00	21:45:00	05:51:00	04:17:00
21:04:00	02:06:00	01:13:00	00:26:00	00:20:00	01:34:00		21:03:00	21:52:00	22:13:00	05:24:00
21:03:00	02:08:00	03:25:00	01:05:00	00:39:00	01:36:00		21:02:00	22:39:00	22:16:00	05:40:00
21:01:00	04:05:00	03:04:00	01:18:00	03:37:00	04:41:00		21:02:00	00:23:00	22:18:00	05:42:00
21:01:00	05:25:00	04:15:00	21:51:00	20:08:00	19:23:00		21:02:00	00:45:00	22:21:00	05:45:00
21:01:00	20:22:00	05:45:00	20:01:00	00:11:00	19:43:00		21:02:00	01:04:00	23:41:00	06:00:00
21:01:00	02:25:00	05:47:00	20:06:00	23:53:00	19:45:00		21:01:00	01:39:00	00:18:00	06:06:00
21:01:00	03:58:00	02:09:00	20:48:00	02:19:00	20:03:00		21:00:00	03:36:00	00:36:00	06:09:00
20:59:00	04:39:00	03:19:00	21:12:00		23:32:00		20:59:00	04:20:00	00:47:00	20:10:00
20:59:00	18:49:00	04:06:00	22:02:00		20:18:00		20:57:00	04:32:00	01:13:00	20:36:00
20:59:00	18:52:00	04:26:00	22:46:00		20:32:00		20:57:00	05:01:00	02:28:00	20:40:00
20:58:00	19:02:00	04:34:00	02:08:00		20:37:00		20:55:00	05:03:00	02:47:00	21:13:00
20:58:00	21:35:00	05:07:00	18:49:00		20:56:00		20:55:00	05:42:00	03:23:00	21:23:00
20:57:00	18:46:00	05:27:00	18:53:00		22:14:00		20:55:00	21:38:00	03:29:00	21:33:00
20:57:00	18:49:00	05:40:00	19:03:00		04:38:00		20:55:00	21:42:00	03:57:00	23:05:00
20:57:00	18:52:00	18:52:00	19:15:00		04:45:00		20:55:00	21:56:00	04:12:00	23:34:00
20:56:00	19:48:00	01:07:00	21:44:00		18:55:00		20:54:00	22:09:00	04:55:00	23:52:00
20:56:00	23:35:00	01:18:00	00:49:00		04:45:00		20:54:00	22:28:00	05:20:00	00:03:00
20:54:00	02:12:00	04:23:00	01:46:00		21:58:00		20:53:00	22:33:00	20:20:00	00:39:00
20:54:00	02:55:00	05:00:00	02:51:00		04:37:00		20:53:00	22:48:00	22:32:00	00:52:00
20:53:00	03:17:00	18:56:00	03:14:00		00:46:00		20:52:00	22:57:00	23:29:00	01:09:00
20:52:00	03:31:00	01:23:00	03:15:00		04:41:00		20:52:00	23:35:00	00:28:00	01:13:00
20:52:00	18:43:00	01:25:00	03:55:00		00:17:00		20:51:00	00:33:00	00:43:00	01:31:00
20:52:00	23:44:00	02:54:00	03:59:00		00:49:00		20:51:00	00:55:00	01:29:00	01:34:00
20:51:00	02:49:00	03:15:00	18:43:00		01:12:00		20:51:00	01:01:00	01:35:00	02:31:00
20:51:00	03:15:00	03:41:00	18:51:00		19:30:00		20:49:00	01:05:00	01:52:00	04:26:00
20:51:00	03:34:00	03:47:00	18:56:00		20:05:00		20:49:00	01:07:00	02:22:00	04:36:00
20:51:00	04:22:00	04:38:00	19:03:00		20:30:00		20:49:00	01:24:00	02:28:00	04:47:00
20:50:00	05:33:00	04:45:00	19:17:00		20:35:00		20:48:00	01:34:00	02:49:00	05:52:00
20:50:00	18:56:00	05:14:00	21:47:00		21:31:00		20:48:00	01:37:00	03:33:00	22:07:00
20:50:00	05:24:00	05:47:00	21:50:00		22:07:00		20:48:00	02:13:00	03:53:00	02:05:00
20:49:00	19:07:00	19:14:00	21:59:00		23:30:00		20:48:00	02:15:00	04:19:00	02:23:00
20:48:00	19:20:00	20:02:00	22:28:00		23:32:00		20:48:00	02:17:00	04:27:00	02:57:00
20:47:00	19:54:00	20:09:00	22:30:00		23:34:00		20:47:00	02:38:00	04:38:00	05:49:00
20:47:00	05:39:00	20:24:00	22:32:00		04:43:00		20:46:00	02:56:00	05:00:00	06:03:00
20:47:00	18:49:00	23:07:00	23:16:00		20:33:00		20:46:00	03:04:00	05:06:00	21:35:00
20:46:00	03:15:00	00:03:00	23:20:00		00:39:00		20:46:00	03:25:00	05:25:00	02:37:00
20:46:00	03:50:00	04:34:00	23:36:00		01:05:00		20:45:00	03:27:00	21:22:00	02:45:00
20:46:00	04:44:00	04:36:00	00:26:00		21:36:00		20:44:00	03:40:00	21:36:00	02:50:00
20:45:00	04:59:00	04:57:00	00:28:00		20:09:00		20:43:00	04:42:00	22:35:00	05:13:00
20:45:00	05:02:00	04:59:00	00:53:00		21:32:00		20:43:00	05:06:00	23:32:00	05:31:00
20:45:00	05:40:00	05:31:00	01:37:00		19:47:00		20:39:00	05:26:00	01:05:00	05:49:00
20:44:00	18:56:00	05:43:00	03:05:00		20:10:00		20:35:00	05:34:00	01:33:00	22:57:00
20:43:00	20:16:00	05:59:00	03:49:00		21:37:00		20:34:00	05:37:00	01:39:00	00:53:00
20:42:00	00:30:00	18:49:00	03:55:00		22:20:00		20:33:00	21:49:00	01:45:00	04:11:00
20:41:00	05:11:00	18:56:00	04:04:00		01:39:00		20:32:00	23:13:00	02:06:00	04:20:00
20:41:00	02:53:00	20:13:00	04:40:00		04:24:00		20:31:00	23:36:00	02:10:00	04:22:00
20:39:00	04:58:00	01:15:00	04:46:00		23:07:00		20:31:00	00:07:00	02:14:00	04:50:00
20:37:00	19:10:00	02:22:00	05:31:00		02:06:00		20:31:00	00:20:00	02:23:00	05:09:00
20:36:00	20:59:00	03:43:00	04:31:00		20:10:00		20:30:00	01:26:00	02:29:00	05:26:00
20:35:00	01:07:00	04:08:00	05:39:00		23:02:00		20:30:00	01:30:00	02:33:00	05:50:00
20:34:00	04:13:00	04:28:00	05:41:00		05:24:00		20:28:00	01:44:00	02:49:00	06:12:00
20:33:00	04:25:00	05:03:00	18:42:00		05:49:00		20:28:00	01:51:00	03:50:00	23:25:00
20:31:00	04:54:00	05:56:00	18:49:00		19:42:00		20:28:00	02:31:00	04:04:00	00:19:00
20:30:00	05:07:00	06:12:00	19:04:00		20:33:00		20:21:00	02:38:00	04:18:00	00:27:00
20:30:00	19:10:00	18:44:00	19:07:00		02:46:00		20:20:00	03:20:00	04:58:00	01:40:00
20:30:00	19:18:00	18:48:00	19:13:00		05:10:00		20:03:00	03:39:00	21:54:00	01:54:00
20:30:00	19:36:00	18:54:00	19:14:00		01:38:00		19:57:00	03:47:00	22:53:00	02:02:00
20:30:00	19:55:00	19:06:00	19:20:00		05:44:00		19:56:00	04:25:00	02:07:00	02:28:00
20:29:00	20:18:00	20:16:00	19:23:00		05:31:00		19:53:00	04:41:00	02:11:00	02:29:00
20:29:00	04:34:00	01:10:00	19:34:00		20:07:00		19:51:00	04:58:00	02:12:00	03:12:00
20:26:00	05:03:00	04:30:00	19:57:00		00:04:00		06:03:00	05:34:00	04:43:00	03:15:00
20:26:00	05:30:00	05:04:00	20:09:00		01:10:00		06:03:00	21:20:00	22:58:00	05:18:00
20:26:00	05:37:00	05:24:00	20:19:00		03:56:00		06:02:00	22:23:00	23:26:00	21:13:00
20:26:00	18:53:00	23:13:00	20:24:00		05:05:00		06:02:00	23:04:00	23:39:00	21:56:00
20:25:00	19:00:00	04:22:00	20:35:00		20:07:00		06:01:00	23:29:00	00:03:00	22:31:00
20:22:00	19:03:00	04:57:00	20:40:00		22:54:00		06:00:00	23:51:00	01:49:00	23:03:00
20:21:00	19:08:00	05:06:00	20:43:00		00:59:00		06:00:00	00:55:00	03:20:00	23:42:00
20:21:00	19:17:00	05:08:00	21:01:00		01:38:00		05:59:00	01:10:00	04:53:00	00:59:00
20:21:00	19:23:00	05:39:00	21:19:00		03:06:00		05:57:00	01:44:00	04:55:00	01:22:00
20:18:00	19:41:00	19:12:00	21:44:00		03:22:00		05:56:00	02:07:00	05:05:00	01:44:00
20:18:00	19:14:00	23:21:00	23:00:00		05:47:00		05:56:00	03:15:00	05:19:00	01:55:00
20:17:00	19:19:00	01:15:00	23:07:00		20:17:00		05:56:00	03:41:00	05:25:00	03:17:00
20:16:00	05:44:00	01:21:00	23:30:00		21:54:00		05:56:00	04:36:00	23:08:00	03:36:00
20:14:00	19:07:00	01:23:00	23:39:00		20:35:00		05:54:00	04:39:00	23:40:00	03:43:00
20:13:00	19:11:00	02:24:00	23:51:00		23:27:00		05:54:00	20:23:00	23:42:00	04:44:00
20:13:00	19:37:00	02:29:00	00:01:00		22:52:00		05:53:00	20:25:00	01:35:00	05:12:00
20:13:00	19:52:00	02:31:00	00:13:00		19:25:00		05:53:00	20:40:00	05:27:00	05:26:00
20:12:00	21:41:00	04:32:00	00:28:00		20:09:00		05:53:00	22:11:00	05:36:00	05:31:00
20:12:00	01:08:00	05:41:00	01:29:00		20:18:00		05:53:00	22:17:00	05:00:00	05:42:00
20:12:00	04:31:00	20:06:00	02:25:00		20:54:00		05:52:00	22:20:00	05:01:00	05:56:00
20:11:00	05:28:00	03:58:00	03:11:00		22:47:00		05:52:00	22:22:00	05:03:00	21:42:00
20:09:00	05:33:00	04:01:00	03:42:00		23:59:00		05:51:00	22:25:00	05:07:00	21:49:00
20:08:00	04:04:00	04:11:00	04:18:00		00:54:00		05:50:00	22:44:00	05:21:00	21:51:00
20:08:00	04:49:00	04:30:00	18:47:00		04:30:00		05:49:00	22:52:00	05:22:00	22:09:00
20:07:00	05:42:00	05:39:00	19:02:00		04:31:00		05:49:00	22:57:00	05:35:00	23:01:00
20:07:00	19:06:00	04:36:00	19:08:00		04:53:00		05:48:00	23:04:00	05:38:00	23:15:00
20:06:00	19:34:00	04:37:00	19:11:00		20:45:00		05:48:00	23:36:00	21:09:00	00:19:00
20:06:00	20:43:00	04:39:00	19:19:00		21:55:00		05:48:00	22:31:00	22:33:00	00:27:00
20:05:00	00:08:00	04:41:00	19:21:00		03:00:00		05:48:00	23:44:00	23:31:00	00:46:00
20:04:00	05:06:00	05:20:00	19:25:00		20:34:00		05:47:00	23:50:00	23:48:00	01:13:00
20:04:00	18:48:00	19:10:00	19:29:00		03:20:00		05:46:00	01:14:00	03:32:00	01:23:00
20:03:00	18:59:00	19:26:00	19:46:00		03:27:00		05:44:00	02:44:00	05:59:00	01:38:00
20:03:00	19:02:00	20:23:00	19:55:00		19:22:00		05:44:00	03:33:00	05:35:00	02:20:00
20:02:00	19:04:00	03:14:00	21:10:00		03:28:00		05:43:00	04:06:00	05:48:00	02:49:00
20:02:00	20:33:00	03:26:00	21:15:00		04:37:00		05:43:00	04:22:00	23:00:00	04:19:00
20:02:00	00:50:00	03:48:00	21:35:00		04:47:00		05:43:00	04:27:00	23:49:00	04:23:00
20:02:00	03:45:00	04:42:00	22:11:00		05:36:00		05:42:00	04:34:00	23:54:00	05:03:00
20:00:00	03:48:00	05:34:00	22:35:00		23:28:00		05:42:00	04:46:00	00:12:00	05:50:00
20:00:00	04:25:00	05:16:00	23:58:00		00:30:00		05:42:00	05:47:00	02:21:00	05:54:00
19:59:00	04:28:00	05:21:00	00:29:00		01:35:00		05:41:00	23:08:00	02:42:00	21:14:00
19:59:00	04:38:00	05:25:00	01:35:00		01:43:00		05:41:00	00:46:00	05:06:00	23:00:00
19:59:00	05:01:00	19:41:00	01:40:00		05:05:00		05:40:00	00:52:00	05:10:00	01:30:00
19:59:00	05:25:00	19:46:00	01:47:00		20:58:00		05:40:00	00:58:00	05:21:00	01:38:00
19:57:00	05:39:00	19:48:00	02:36:00		23:34:00		05:40:00	02:59:00	20:17:00	02:08:00
19:56:00	19:41:00	04:22:00	02:52:00		00:21:00		05:39:00	03:41:00	20:35:00	03:10:00
19:56:00	19:45:00	18:57:00	02:54:00		01:40:00		05:39:00	03:45:00	20:38:00	04:02:00
19:55:00	00:10:00	19:04:00	03:18:00		02:25:00		05:39:00	03:48:00	20:45:00	05:06:00
19:55:00	00:17:00	19:06:00	03:48:00		03:24:00		05:39:00	04:42:00	20:48:00	05:34:00
19:55:00	01:40:00	19:11:00	04:44:00		05:11:00		05:38:00	04:47:00	20:54:00	05:50:00
19:54:00	01:41:00	19:15:00	05:31:00		19:18:00		05:38:00	05:22:00	20:56:00	01:26:00
19:53:00	01:44:00	19:26:00	18:37:00		19:48:00		05:38:00	21:57:00	21:19:00	02:44:00
19:51:00	03:51:00	19:54:00	18:41:00		19:50:00		05:36:00	00:24:00	21:24:00	03:15:00
19:49:00	03:58:00	20:01:00	18:51:00		20:38:00		05:35:00	00:36:00	21:39:00	05:04:00
19:49:00	04:23:00	20:06:00	18:53:00		23:27:00		05:35:00	00:41:00	21:51:00	05:46:00
19:47:00	04:27:00	20:14:00	19:08:00		23:50:00		05:35:00	00:46:00	21:59:00	05:49:00
19:46:00	19:18:00	23:35:00	19:18:00		03:42:00		05:34:00	01:24:00	22:20:00	20:35:00
19:45:00	05:31:00	23:37:00	19:33:00		04:42:00		05:33:00	03:07:00	22:42:00	21:04:00
19:42:00	05:35:00	23:55:00	19:53:00		23:39:00		05:33:00	03:24:00	22:52:00	21:10:00
19:41:00	19:53:00	00:44:00	20:27:00		00:21:00		05:33:00	03:48:00	23:42:00	21:24:00
19:40:00	20:03:00	01:06:00	21:54:00		01:08:00		05:33:00	04:10:00	23:48:00	21:39:00
19:40:00	20:35:00	01:34:00	00:12:00		03:59:00		05:32:00	04:17:00	00:11:00	21:40:00
19:39:00	21:18:00	02:11:00	00:24:00		05:04:00		05:32:00	05:20:00	00:28:00	21:44:00
19:39:00	21:47:00	02:33:00	00:36:00		05:27:00		05:32:00	05:21:00	00:32:00	21:59:00
19:39:00	03:34:00	19:06:00	00:49:00		05:36:00		05:32:00	23:33:00	00:36:00	22:06:00
19:38:00	04:37:00	20:13:00	01:18:00		03:47:00		05:31:00	02:36:00	02:03:00	22:36:00
19:38:00	05:09:00	02:03:00	01:34:00		05:06:00		05:31:00	03:49:00	02:05:00	20:59:00
19:36:00	19:00:00	04:24:00	01:45:00		00:09:00		05:31:00	20:45:00	03:03:00	21:20:00
19:35:00	19:02:00	04:36:00	02:38:00		21:43:00		05:30:00	20:55:00	03:42:00	21:24:00
19:34:00	19:04:00	05:17:00	02:45:00		22:30:00		05:30:00	21:34:00	04:22:00	21:56:00
19:33:00	19:06:00	05:30:00	03:34:00		00:28:00		05:30:00	21:59:00	05:19:00	22:16:00
19:32:00	19:46:00	19:50:00	03:40:00		03:41:00		05:29:00	02:31:00	05:23:00	22:53:00
19:30:00	19:55:00	19:04:00	03:45:00		05:16:00		05:29:00	03:08:00	21:02:00	23:23:00
19:30:00	01:11:00	19:07:00	03:49:00		05:27:00		05:29:00	05:44:00	21:06:00	00:07:00
19:30:00	02:53:00	19:27:00	04:02:00		04:05:00		05:29:00	20:51:00	21:26:00	00:20:00
19:30:00	03:20:00	19:39:00	04:13:00		04:12:00		05:27:00	21:54:00	22:16:00	01:14:00
19:30:00	04:00:00	19:54:00	04:30:00		05:22:00		05:27:00	22:02:00	23:38:00	01:40:00
19:29:00	04:16:00	20:01:00	04:41:00		05:39:00		05:26:00	23:35:00	23:50:00	01:50:00
19:28:00	04:26:00	20:03:00	04:54:00		19:21:00		05:26:00	23:38:00	23:53:00	01:53:00
19:28:00	19:09:00	02:37:00	05:31:00		19:58:00		05:26:00	23:50:00	00:49:00	01:57:00
19:28:00	20:06:00	02:55:00	05:40:00		20:25:00		05:25:00	23:53:00	00:50:00	02:16:00
19:28:00	03:10:00	04:01:00	05:57:00		04:03:00		05:25:00	00:51:00	00:53:00	02:25:00
19:28:00	03:25:00	01:23:00	18:38:00		05:12:00		05:25:00	01:38:00	00:55:00	02:35:00
19:28:00	04:00:00	05:13:00	18:41:00		05:36:00		05:25:00	01:41:00	02:09:00	02:55:00
19:27:00	04:20:00	05:15:00	18:50:00		19:36:00		05:25:00	02:30:00	02:12:00	03:00:00
19:26:00	05:33:00	05:19:00	18:54:00		19:39:00		05:25:00	02:35:00	02:29:00	03:07:00
19:25:00	05:40:00	19:03:00	19:05:00		03:27:00		05:25:00	02:34:00	02:48:00	03:36:00
19:25:00	04:48:00	19:23:00	19:08:00		05:14:00		05:24:00	02:50:00	02:50:00	03:42:00
19:24:00	20:18:00	19:42:00	19:22:00		01:30:00		05:24:00	02:59:00	02:54:00	03:50:00
19:23:00	23:44:00	19:45:00	19:29:00		03:27:00		05:24:00	03:17:00	03:04:00	04:20:00
19:23:00	04:20:00	20:13:00	19:57:00		01:21:00		05:24:00	03:20:00	03:14:00	04:39:00
19:23:00	04:38:00	04:26:00	20:00:00		05:07:00		05:24:00	04:36:00	03:44:00	04:42:00
19:23:00	05:23:00	04:29:00	20:38:00				05:23:00	04:49:00	03:56:00	04:53:00
19:22:00	19:55:00	04:34:00	20:52:00				05:23:00	04:51:00	04:26:00	05:14:00
19:21:00	19:18:00	19:37:00	21:20:00				05:23:00	04:55:00	04:58:00	05:29:00
19:21:00	19:24:00	20:22:00	21:46:00				05:22:00	05:16:00	20:40:00	05:53:00
19:21:00	00:03:00	05:04:00	22:05:00				05:22:00	05:38:00	21:19:00	06:02:00
19:21:00	04:09:00	05:44:00	22:12:00				05:22:00	05:53:00	22:18:00	23:08:00
19:21:00	21:22:00	19:40:00	22:35:00				05:22:00	20:28:00	23:15:00	01:11:00
19:20:00	05:44:00	21:02:00	23:26:00				05:22:00	20:51:00	04:37:00	01:59:00
19:16:00	19:18:00	05:20:00	23:37:00				05:22:00	21:11:00	01:54:00	02:49:00
19:15:00	20:18:00	05:23:00	00:20:00				05:21:00	21:37:00	02:14:00	02:57:00
19:15:00	20:29:00	05:24:00	03:42:00				05:21:00	21:59:00	02:37:00	03:32:00
19:15:00	20:32:00	19:28:00	03:48:00				05:20:00	22:16:00	03:53:00	03:42:00
19:15:00	21:23:00	19:42:00	04:00:00				05:20:00	22:48:00	04:43:00	04:23:00
19:15:00	23:40:00	20:00:00	18:45:00				05:20:00	23:03:00	04:54:00	04:38:00
19:14:00	23:46:00	05:15:00	18:49:00				05:20:00	23:09:00	05:18:00	05:10:00
19:13:00	03:40:00	05:17:00	18:51:00				05:20:00	23:26:00	22:07:00	05:12:00
19:13:00	03:51:00	05:38:00	18:57:00				05:19:00	23:37:00	01:08:00	05:29:00
19:13:00	03:53:00	19:20:00	19:06:00				05:18:00	23:52:00	01:55:00	05:35:00
19:12:00	04:09:00	19:44:00	19:09:00				05:18:00	00:01:00	03:55:00	05:48:00
19:12:00	04:53:00	04:47:00	19:15:00				05:18:00	00:11:00	04:47:00	05:51:00
19:12:00	05:09:00	04:50:00	19:19:00				05:18:00	00:18:00	22:00:00	05:53:00
19:11:00	20:26:00	05:13:00	19:25:00				05:18:00	00:33:00	22:58:00	05:58:00
19:11:00	19:15:00	05:16:00	19:41:00				05:17:00	00:48:00	23:33:00	06:01:00
19:10:00	19:18:00	05:04:00	19:46:00				05:17:00	01:20:00	23:46:00	23:02:00
19:10:00	19:26:00	18:54:00	19:58:00				05:17:00	01:31:00	00:31:00	23:57:00
19:10:00	19:30:00	20:09:00	20:26:00				05:17:00	02:02:00	01:16:00	01:56:00
19:10:00	20:05:00	20:57:00	20:37:00				05:16:00	02:05:00	02:04:00	01:58:00
19:10:00	03:10:00	21:23:00	20:59:00				05:16:00	02:22:00	02:20:00	03:35:00
19:09:00	03:54:00	22:05:00	21:37:00				05:16:00	02:24:00	03:16:00	04:08:00
19:09:00	05:16:00	18:45:00	21:41:00				05:16:00	02:31:00	03:30:00	04:18:00
19:09:00	05:19:00	18:59:00	22:01:00				05:16:00	02:38:00	03:37:00	04:48:00
19:09:00	19:00:00	19:10:00	22:25:00				05:16:00	02:48:00	04:50:00	04:57:00
19:09:00	19:29:00	19:19:00	23:46:00				05:16:00	02:55:00	05:03:00	05:05:00
19:09:00	21:45:00	19:25:00	00:32:00				05:15:00	03:18:00	05:07:00	05:15:00
19:09:00	22:06:00	19:30:00	01:16:00				05:15:00	03:22:00	05:30:00	05:38:00
19:09:00	23:57:00	20:35:00	01:46:00				05:15:00	03:43:00	23:34:00	05:50:00
19:09:00	00:31:00	20:56:00	02:15:00				05:15:00	03:46:00	02:00:00	20:34:00
19:09:00	01:27:00	21:36:00	02:20:00				05:15:00	04:31:00	03:21:00	22:04:00
19:08:00	19:09:00	22:05:00	03:30:00				05:14:00	04:51:00	03:48:00	23:10:00
19:08:00	19:47:00	22:46:00	18:55:00				05:14:00	04:59:00	04:07:00	01:35:00
19:08:00	21:27:00	00:11:00	19:37:00				05:14:00	05:09:00	04:50:00	01:40:00
19:08:00	19:14:00	01:28:00	20:54:00				05:14:00	05:16:00	05:21:00	02:13:00
19:07:00	19:43:00	02:18:00	21:05:00				05:14:00	05:16:00	05:25:00	02:34:00
19:07:00	20:15:00	03:41:00	21:08:00				05:14:00	05:18:00	22:35:00	04:14:00
19:07:00	20:24:00	04:49:00	21:41:00				05:13:00	05:36:00	01:48:00	04:48:00
19:06:00	19:32:00	05:01:00	22:00:00				05:12:00	05:52:00	04:21:00	20:25:00
19:06:00	19:49:00	05:03:00	23:43:00				05:12:00	21:27:00	04:37:00	21:14:00
19:06:00	22:08:00	05:29:00	00:45:00				05:11:00	23:11:00	04:39:00	21:42:00
19:06:00	00:36:00	19:21:00	01:11:00				05:11:00	00:00:00	20:23:00	23:28:00
19:06:00	01:06:00	04:04:00	01:14:00				05:11:00	00:20:00	20:26:00	23:32:00
19:06:00	19:28:00	04:12:00	01:17:00				05:10:00	00:22:00	20:32:00	00:30:00
19:05:00	20:29:00	19:47:00	01:29:00				05:10:00	00:40:00	21:14:00	00:34:00
19:05:00	20:54:00	20:02:00	01:46:00				05:10:00	00:50:00	21:18:00	01:57:00
19:05:00	02:56:00	20:16:00	02:10:00				05:10:00	01:05:00	21:28:00	02:24:00
19:04:00	05:49:00	20:18:00	02:35:00				05:10:00	01:10:00	22:04:00	02:51:00
19:04:00	19:14:00	20:21:00	02:38:00				05:10:00	01:31:00	22:43:00	20:22:00
19:04:00	19:29:00	20:11:00	02:40:00				05:09:00	01:43:00	23:32:00	21:24:00
19:04:00	19:34:00	21:03:00	02:42:00				05:08:00	01:44:00	23:46:00	21:43:00
19:03:00	20:12:00	21:06:00	02:48:00				05:08:00	01:45:00	05:35:00	22:12:00
19:03:00	20:46:00	21:11:00	03:40:00				05:08:00	01:50:00	22:32:00	22:30:00
19:03:00	22:25:00	22:06:00	04:16:00				05:06:00	01:58:00	23:02:00	22:49:00
19:03:00	19:33:00	22:12:00	04:22:00				05:06:00	02:14:00	23:50:00	23:07:00
19:02:00	20:04:00	22:58:00	04:27:00				05:05:00	02:14:00	00:09:00	23:13:00
19:02:00	22:52:00	00:01:00	04:34:00				05:05:00	02:20:00	03:28:00	00:36:00
19:02:00	02:59:00	00:46:00	04:40:00				05:05:00	02:33:00	21:22:00	01:03:00
19:01:00	05:39:00	00:59:00	04:49:00				05:04:00	03:41:00	22:19:00	01:30:00
19:01:00	05:47:00	01:14:00	05:12:00				05:03:00	05:25:00	22:22:00	01:39:00
19:01:00	19:05:00	01:19:00	18:53:00				05:03:00	05:34:00	22:34:00	01:51:00
19:00:00	20:24:00	01:56:00	18:59:00				05:03:00	20:48:00	22:48:00	02:00:00
18:59:00	00:37:00	02:43:00	19:01:00				05:03:00	21:10:00	23:11:00	02:35:00
18:58:00	02:57:00	03:16:00	19:07:00				05:02:00	00:35:00	23:34:00	04:05:00
18:58:00	04:14:00	03:36:00	19:08:00				05:01:00	00:50:00	00:04:00	05:07:00
18:57:00	20:16:00	19:55:00	19:16:00				05:01:00	03:15:00	00:52:00	05:13:00
18:57:00	18:47:00	04:34:00	19:22:00				05:01:00	03:24:00	00:56:00	20:23:00
18:57:00	18:49:00	19:04:00	19:28:00				05:01:00	04:14:00	01:15:00	20:40:00
18:56:00	19:05:00	19:56:00	20:06:00				04:59:00	05:05:00	02:08:00	21:14:00
18:56:00	19:37:00	20:47:00	20:11:00				04:58:00	05:28:00	03:41:00	23:20:00
18:56:00	20:08:00	20:51:00	20:31:00				04:58:00	05:40:00	03:59:00	23:29:00
18:55:00	20:41:00	21:47:00	22:40:00				04:58:00	23:52:00	04:54:00	00:25:00
18:55:00	21:05:00	23:53:00	23:26:00				04:58:00	02:08:00	04:56:00	01:07:00
18:55:00	23:27:00	03:05:00	23:27:00				04:58:00	03:04:00	05:04:00	01:24:00
18:54:00	00:15:00	03:11:00	00:07:00				04:57:00	03:56:00	05:10:00	02:15:00
18:54:00	00:30:00	04:03:00	00:37:00				04:57:00	04:22:00	05:15:00	02:56:00
18:52:00	01:16:00	04:57:00	00:58:00				04:57:00	04:44:00	05:24:00	03:29:00
18:52:00	01:19:00	19:11:00	01:01:00				04:57:00	04:56:00	05:34:00	03:39:00
18:52:00	19:10:00	19:23:00	02:10:00				04:56:00	04:57:00	21:17:00	04:03:00
18:50:00	19:13:00	20:23:00	02:20:00				04:56:00	05:21:00	21:38:00	04:14:00
18:50:00	19:20:00	21:19:00	02:57:00				04:56:00	05:22:00	22:35:00	04:34:00
18:50:00	19:34:00	21:41:00	03:10:00				04:56:00	05:35:00	22:47:00	04:52:00
18:48:00	20:30:00	00:25:00	03:31:00				04:56:00	20:35:00	02:04:00	04:56:00
18:45:00	20:36:00	04:16:00	03:51:00				04:56:00	20:53:00	02:07:00	05:04:00
18:45:00	20:44:00	05:09:00	04:15:00				04:56:00	21:27:00	03:17:00	05:12:00
18:44:00	20:46:00	19:12:00	04:29:00				04:56:00	21:42:00	03:22:00	05:16:00
18:43:00	20:57:00	20:41:00	04:38:00				04:56:00	21:50:00	03:49:00	05:28:00
10:07:00	21:10:00	04:18:00	04:47:00				04:55:00	22:25:00	03:55:00	20:37:00
06:51:00	21:23:00	05:20:00	04:51:00				04:55:00	22:29:00	04:34:00	22:10:00
06:49:00	21:55:00	05:47:00	18:57:00				04:54:00	23:07:00	05:38:00	23:44:00
06:16:00	21:58:00	19:43:00	19:18:00				04:53:00	23:20:00	21:42:00	23:59:00
06:15:00	22:11:00	00:47:00	19:33:00				04:52:00	23:26:00	21:56:00	00:00:00
06:13:00	22:18:00	01:15:00	22:40:00				04:52:00	23:46:00	22:27:00	00:01:00
06:09:00	22:34:00	04:00:00	01:36:00				04:51:00	00:00:00	22:59:00	00:04:00
06:00:00	23:32:00	04:02:00	02:21:00				04:51:00	00:05:00	23:59:00	00:10:00
05:53:00	00:23:00	04:37:00	03:07:00				04:50:00	00:57:00	00:47:00	01:44:00
05:53:00	19:01:00	04:49:00	03:09:00				04:50:00	01:27:00	01:25:00	02:14:00
05:53:00	19:03:00	05:21:00	03:56:00				04:50:00	01:30:00	02:05:00	03:00:00
05:51:00	19:05:00	05:28:00	04:03:00				04:49:00	02:41:00	02:11:00	03:38:00
05:48:00	19:05:00	19:50:00	04:38:00				04:49:00	03:43:00	02:21:00	04:04:00
05:46:00	20:11:00	21:37:00	18:57:00				04:49:00	04:43:00	02:52:00	05:33:00
05:45:00	20:50:00	22:54:00	19:00:00				04:49:00	05:28:00	03:19:00	20:32:00
05:45:00	18:58:00	02:14:00	19:03:00				04:48:00	05:30:00	03:47:00	20:35:00
05:45:00	19:03:00	03:56:00	19:10:00				04:48:00	20:46:00	01:54:00	20:40:00
05:45:00	20:38:00	05:22:00	19:21:00				04:47:00	20:48:00	03:05:00	20:43:00
05:44:00	22:06:00	05:24:00	19:30:00				04:46:00	20:53:00	05:27:00	21:03:00
05:44:00	22:14:00	19:33:00	19:44:00				04:46:00	21:26:00	22:21:00	21:16:00
05:44:00	22:51:00	21:43:00	19:48:00				04:45:00	21:40:00	03:17:00	21:29:00
05:44:00	02:44:00	05:03:00	20:06:00				04:45:00	21:43:00	22:27:00	21:36:00
05:43:00	03:11:00	05:10:00	20:32:00				04:44:00	21:45:00	22:45:00	21:46:00
05:43:00	04:47:00	05:25:00	20:36:00				04:44:00	22:19:00	22:54:00	23:17:00
05:42:00	05:36:00	21:25:00	20:40:00				04:44:00	22:31:00	23:15:00	00:16:00
05:42:00	18:58:00	18:55:00	21:33:00				04:43:00	22:42:00	23:44:00	00:34:00
05:42:00	19:16:00	18:59:00	22:17:00				04:43:00	22:48:00	00:33:00	00:50:00
05:42:00	20:32:00	19:01:00	22:37:00				04:41:00	23:11:00	04:30:00	01:08:00
05:42:00	19:38:00	19:02:00	23:13:00				04:41:00	23:13:00	05:10:00	01:48:00
05:41:00	19:58:00	19:10:00	23:33:00				04:41:00	01:26:00	21:20:00	02:02:00
05:40:00	20:10:00	19:15:00	00:32:00				04:41:00	01:52:00	02:23:00	02:14:00
05:40:00	21:10:00	21:09:00	00:42:00				04:41:00	01:56:00	04:26:00	02:39:00
05:40:00	04:33:00	21:12:00	01:22:00				04:41:00	02:09:00	04:56:00	02:47:00
05:39:00	19:13:00	21:30:00	01:34:00				04:40:00	02:39:00	00:32:00	02:55:00
05:39:00	19:57:00	23:45:00	02:07:00				04:40:00	04:10:00	20:43:00	03:15:00
05:39:00	21:04:00	03:45:00	02:14:00				04:40:00	05:07:00	04:07:00	03:20:00
05:39:00	21:07:00	05:26:00	03:03:00				04:39:00	05:31:00	05:43:00	03:41:00
05:39:00	21:42:00	19:45:00	03:25:00				04:39:00	21:41:00	21:34:00	03:56:00
05:38:00	22:00:00	21:31:00	04:07:00				04:39:00	00:12:00	00:31:00	04:09:00
05:38:00	22:58:00	01:36:00	04:29:00				04:39:00	00:57:00	03:33:00	04:15:00
05:37:00	03:37:00	01:40:00	04:50:00				04:38:00	01:01:00	04:24:00	04:17:00
05:37:00	18:53:00	03:22:00	04:59:00				04:38:00	01:11:00	05:09:00	05:00:00
05:37:00	18:57:00	19:04:00	18:42:00				04:37:00	02:25:00	20:24:00	05:10:00
05:36:00	19:05:00	19:12:00	18:46:00				04:37:00	04:03:00	20:56:00	05:15:00
05:36:00	19:07:00	19:30:00	22:12:00				04:37:00	05:08:00	21:13:00	05:45:00
05:36:00	19:32:00	19:41:00	02:42:00				04:36:00	20:33:00	21:54:00	05:56:00
05:36:00	21:03:00	20:03:00	03:47:00				04:36:00	20:41:00	22:26:00	21:27:00
05:36:00	21:21:00	20:07:00	03:57:00				04:36:00	22:05:00	22:39:00	23:26:00
05:36:00	02:42:00	20:36:00	04:38:00				04:35:00	22:15:00	22:59:00	00:35:00
05:35:00	02:48:00	20:39:00	04:43:00				04:35:00	23:58:00	23:08:00	01:48:00
05:35:00	04:20:00	20:45:00	04:54:00				04:35:00	00:12:00	02:22:00	02:08:00
05:35:00	05:44:00	21:06:00	06:01:00				04:35:00	02:08:00	02:25:00	02:38:00
05:35:00	19:05:00	21:08:00	18:44:00				04:35:00	02:36:00	02:53:00	03:01:00
05:34:00	19:09:00	21:53:00	18:54:00				04:34:00	02:38:00	04:22:00	03:41:00
05:34:00	19:10:00	22:01:00	21:59:00				04:34:00	02:51:00	04:49:00	03:53:00
05:33:00	19:31:00	22:43:00	23:55:00				04:34:00	04:21:00	04:51:00	04:22:00
05:33:00	03:06:00	22:58:00	03:56:00				04:34:00	05:08:00	05:13:00	04:56:00
05:33:00	03:55:00	23:01:00	04:15:00				04:34:00	21:17:00	05:18:00	04:57:00
05:33:00	03:59:00	23:03:00	05:08:00				04:34:00	21:57:00	05:20:00	04:58:00
05:32:00	04:39:00	23:53:00	05:22:00				04:34:00	22:23:00	22:23:00	05:09:00
05:32:00	20:02:00	00:12:00	18:40:00				04:33:00	22:45:00	23:04:00	05:14:00
05:30:00	20:37:00	00:25:00	18:43:00				04:33:00	23:37:00	23:53:00	05:22:00
05:30:00	21:05:00	00:28:00	18:46:00				04:33:00	00:08:00	00:37:00	05:30:00
05:30:00	22:09:00	01:03:00	18:54:00				04:33:00	00:19:00	01:33:00	05:32:00
05:29:00	03:52:00	01:05:00	19:02:00				04:33:00	01:27:00	04:54:00	05:47:00
05:29:00	19:29:00	01:23:00	20:41:00				04:32:00	03:19:00	20:40:00	05:53:00
05:29:00	21:15:00	01:25:00	20:46:00				04:32:00	03:44:00	21:42:00	22:29:00
05:28:00	21:44:00	02:08:00	20:48:00				04:32:00	03:58:00	22:00:00	22:34:00
05:27:00	22:05:00	03:43:00	20:51:00				04:32:00	04:06:00	22:27:00	01:29:00
05:27:00	22:07:00	04:38:00	21:03:00				04:32:00	04:34:00	22:37:00	03:13:00
05:27:00	19:23:00	04:52:00	23:04:00				04:32:00	05:13:00	00:32:00	04:53:00
05:27:00	21:11:00	05:34:00	00:03:00				04:32:00	05:41:00	00:38:00	05:07:00
05:27:00	21:27:00	20:17:00	00:33:00				04:31:00	05:44:00	01:13:00	05:13:00
05:26:00	21:29:00	20:54:00	21:08:00				04:30:00	05:50:00	02:05:00	05:15:00
05:26:00	21:56:00	04:01:00	00:55:00				04:29:00	05:52:00	02:17:00	05:39:00
05:26:00	22:33:00	04:39:00	01:13:00				04:29:00	05:25:00	02:31:00	05:50:00
05:26:00	23:27:00	05:42:00	03:03:00				04:28:00	01:08:00	03:07:00	05:57:00
05:26:00	23:55:00	19:07:00	22:04:00				04:27:00	04:22:00	03:51:00	20:51:00
05:25:00	00:10:00	19:14:00	00:41:00				04:26:00	04:59:00	05:27:00	21:26:00
05:25:00	00:12:00	20:10:00	04:22:00				04:25:00	05:18:00	23:56:00	23:51:00
05:25:00	00:22:00	20:19:00	05:05:00				04:25:00	05:20:00	00:36:00	00:14:00
05:25:00	00:35:00	20:28:00	06:04:00				04:24:00	05:30:00	00:46:00	00:16:00
05:25:00	00:44:00	20:47:00	18:37:00				04:24:00	05:34:00	03:14:00	00:37:00
05:25:00	01:36:00	21:45:00	18:50:00				04:24:00	05:37:00	04:28:00	00:57:00
05:24:00	01:44:00	05:06:00	21:16:00				04:23:00	05:45:00	05:38:00	01:15:00
05:24:00	01:48:00	19:37:00	22:45:00				04:23:00	20:34:00	05:55:00	01:45:00
05:24:00	19:38:00	19:51:00	22:58:00				04:22:00	20:48:00	20:50:00	01:47:00
05:24:00	19:53:00	20:00:00	05:05:00				04:21:00	21:18:00	22:51:00	02:02:00
05:24:00	21:55:00	21:51:00	18:47:00				04:21:00	21:25:00	23:11:00	02:28:00
05:23:00	22:36:00	22:39:00	18:59:00				04:20:00	21:36:00	23:41:00	03:56:00
05:23:00	23:55:00	05:41:00	19:04:00				04:20:00	21:43:00	02:21:00	04:41:00
05:22:00	01:39:00	20:06:00	20:01:00				04:20:00	22:18:00	03:22:00	05:05:00
05:22:00	01:46:00	21:12:00	23:41:00				04:20:00	22:29:00	03:37:00	05:33:00
05:22:00	05:33:00	04:35:00	02:03:00				04:19:00	22:43:00	04:26:00	05:47:00
05:22:00	19:27:00	05:41:00	02:40:00				04:19:00	23:21:00	04:51:00	20:28:00
05:22:00	21:55:00	19:18:00	05:52:00				04:19:00	23:28:00	04:58:00	21:00:00
05:22:00	23:09:00	20:39:00	18:54:00				04:19:00	23:42:00	05:13:00	21:28:00
05:22:00	02:37:00	21:20:00	00:50:00				04:18:00	23:44:00	23:56:00	21:41:00
05:22:00	05:32:00	21:22:00	03:01:00				04:18:00	23:47:00	01:36:00	21:43:00
05:21:00	23:07:00	22:18:00	04:25:00				04:17:00	23:45:00	01:58:00	22:15:00
05:21:00	00:41:00	22:22:00	04:28:00				04:17:00	01:05:00	02:06:00	22:51:00
05:21:00	03:28:00	05:12:00	04:44:00				04:17:00	01:08:00	02:16:00	23:56:00
05:21:00	04:37:00	05:29:00	05:08:00				04:16:00	01:23:00	04:27:00	00:08:00
05:21:00	02:37:00	05:31:00	05:26:00				04:16:00	01:52:00	04:29:00	00:31:00
05:21:00	03:42:00	22:11:00	06:04:00				04:14:00	02:44:00	04:31:00	01:06:00
05:20:00	04:53:00	22:34:00	18:49:00				04:13:00	03:54:00	05:05:00	01:25:00
05:20:00	19:18:00	22:36:00	18:51:00				04:12:00	04:19:00	00:32:00	01:33:00
05:20:00	19:53:00	22:57:00	19:00:00				04:12:00	05:33:00	00:43:00	01:44:00
05:20:00	21:55:00	23:38:00	00:30:00				04:12:00	05:48:00	04:12:00	02:05:00
05:20:00	23:07:00	00:48:00	05:46:00				04:12:00	20:58:00	04:30:00	02:15:00
05:19:00	19:49:00	01:51:00	18:49:00				04:10:00	00:42:00	21:50:00	02:23:00
05:19:00	23:33:00	01:54:00	18:51:00				04:09:00	02:12:00	00:02:00	02:55:00
05:19:00	19:12:00	03:11:00	22:57:00				04:09:00	02:41:00	04:05:00	03:03:00
05:19:00	19:23:00	03:16:00	23:47:00				04:09:00	03:21:00	05:07:00	03:21:00
05:19:00	19:42:00	04:12:00	03:43:00				04:08:00	03:29:00	05:51:00	03:38:00
05:18:00	20:18:00	05:14:00	04:03:00				04:08:00	04:44:00	20:25:00	03:56:00
05:18:00	20:33:00	05:31:00	06:03:00				04:06:00	04:53:00	21:44:00	04:06:00
05:18:00	20:36:00	05:40:00	06:04:00				04:06:00	05:17:00	23:42:00	04:21:00
05:18:00	21:18:00	23:25:00	22:37:00				04:06:00	05:17:00	00:22:00	04:23:00
05:17:00	21:33:00	00:10:00	02:10:00				04:04:00	05:54:00	01:51:00	04:37:00
05:17:00	22:05:00	00:11:00	05:07:00				04:04:00	21:55:00	01:57:00	04:55:00
05:16:00	23:09:00	00:13:00	05:34:00				04:03:00	22:51:00	02:24:00	05:22:00
05:16:00	23:11:00	00:16:00	18:57:00				04:03:00	23:59:00	03:04:00	05:45:00
05:16:00	23:42:00	05:40:00	19:01:00				04:02:00	00:18:00	03:38:00	22:11:00
05:16:00	23:48:00	18:55:00	19:03:00				04:02:00	00:43:00	04:22:00	22:27:00
05:15:00	00:51:00	18:59:00	19:08:00				04:01:00	01:03:00	04:26:00	23:19:00
05:15:00	00:57:00	19:10:00	19:24:00				04:01:00	01:06:00	04:50:00	23:55:00
05:15:00	01:52:00	22:12:00	19:54:00				04:00:00	01:17:00	05:19:00	00:15:00
05:15:00	02:07:00	22:36:00	19:45:00				03:59:00	01:28:00	05:33:00	01:58:00
05:14:00	02:12:00	23:25:00	20:00:00				03:59:00	02:11:00	05:36:00	02:04:00
05:14:00	02:15:00	01:46:00	20:08:00				03:59:00	02:48:00	23:24:00	03:16:00
05:13:00	02:19:00	20:38:00	20:43:00				03:58:00	03:06:00	00:59:00	04:39:00
05:13:00	02:43:00	22:02:00	21:04:00				03:58:00	03:30:00	01:25:00	04:46:00
05:12:00	03:23:00	02:29:00	21:09:00				03:58:00	03:41:00	02:23:00	04:54:00
05:12:00	03:47:00	05:26:00	21:17:00				03:58:00	04:29:00	02:25:00	04:56:00
05:12:00	03:48:00	19:25:00	21:23:00				03:58:00	04:38:00	02:44:00	05:06:00
05:12:00	03:50:00	20:50:00	21:38:00				03:57:00	04:43:00	03:26:00	22:03:00
05:12:00	03:54:00	19:16:00	21:46:00				03:57:00	04:51:00	03:32:00	22:10:00
05:12:00	03:57:00	19:37:00	22:47:00				03:57:00	05:15:00	03:34:00	22:23:00
05:11:00	03:58:00	19:43:00	01:24:00				03:57:00	05:18:00	03:37:00	23:41:00
05:11:00	04:00:00	19:46:00	02:21:00				03:56:00	05:26:00	04:33:00	00:16:00
05:09:00	04:05:00	21:36:00	02:29:00				03:56:00	05:28:00	05:26:00	00:38:00
05:08:00	04:26:00	21:53:00	04:30:00				03:55:00	05:46:00	05:34:00	01:57:00
05:08:00	04:28:00	21:58:00	04:53:00				03:54:00	01:50:00	05:36:00	02:53:00
05:08:00	04:24:00	22:18:00	05:13:00				03:53:00	03:09:00	21:01:00	02:59:00
05:08:00	04:45:00	22:29:00	05:53:00				03:53:00	04:23:00	22:34:00	03:56:00
05:08:00	04:47:00	22:37:00	18:42:00				03:53:00	04:50:00	23:53:00	04:41:00
05:08:00	04:49:00	22:40:00	18:44:00				03:53:00	04:52:00	00:24:00	05:01:00
05:08:00	04:50:00	23:00:00	18:47:00				03:53:00	21:47:00	00:38:00	03:18:00
05:08:00	04:51:00	23:29:00	18:50:00				03:52:00	22:03:00	01:52:00	04:50:00
05:07:00	04:57:00	23:47:00	18:52:00				03:52:00	22:33:00	02:48:00	05:50:00
05:07:00	04:59:00	00:33:00	18:59:00				03:52:00	22:48:00	03:12:00	22:21:00
05:07:00	05:00:00	01:30:00	22:50:00				03:52:00	22:51:00	03:46:00	03:51:00
05:07:00	05:03:00	03:20:00	19:06:00				03:52:00	23:03:00	04:26:00	04:31:00
05:07:00	18:53:00	05:29:00	19:17:00				03:51:00	00:35:00	05:20:00	05:27:00
05:06:00	20:00:00	19:14:00	19:30:00				03:51:00	02:08:00	05:38:00	05:32:00
05:06:00	21:08:00	19:50:00	19:44:00				03:50:00	04:20:00	00:27:00	05:40:00
05:06:00	23:02:00	20:41:00	20:38:00				03:49:00	04:41:00	02:41:00	05:53:00
05:06:00	23:05:00	21:54:00	21:28:00				03:49:00	23:18:00	02:47:00	22:36:00
05:05:00	23:41:00	02:20:00	23:52:00				03:49:00	01:04:00	03:01:00	00:32:00
05:04:00	23:45:00	02:22:00	00:33:00				03:49:00	01:12:00	03:07:00	01:25:00
05:04:00	00:38:00	03:46:00	00:55:00				03:49:00	01:21:00	04:29:00	01:55:00
05:04:00	00:56:00	05:29:00	19:01:00				03:48:00	01:31:00	20:34:00	02:55:00
05:03:00	01:30:00	19:26:00	19:13:00				03:48:00	01:36:00	00:28:00	03:23:00
05:03:00	01:19:00	20:01:00	21:34:00				03:48:00	02:17:00	01:43:00	03:54:00
05:02:00	04:09:00	21:43:00	00:30:00				03:48:00	02:44:00	02:29:00	05:39:00
05:01:00	04:32:00	21:57:00	02:35:00				03:48:00	03:01:00	03:11:00	00:55:00
05:01:00	20:03:00	22:45:00	18:55:00				03:47:00	03:23:00	04:47:00	02:47:00
05:00:00	21:27:00	22:55:00	19:05:00				03:47:00	05:46:00	01:44:00	03:29:00
05:00:00	22:10:00	01:25:00	19:08:00				03:46:00	20:20:00	23:14:00	03:31:00
04:59:00	23:42:00	03:36:00	19:29:00				03:45:00	22:55:00	23:17:00	03:58:00
04:59:00	23:45:00	04:20:00	03:10:00				03:45:00	23:29:00	00:26:00	04:53:00
04:57:00	01:06:00	04:24:00	03:11:00				03:44:00	23:41:00	00:28:00	05:13:00
04:57:00	01:33:00	04:27:00	03:14:00				03:44:00	23:46:00	00:43:00	05:17:00
04:57:00	00:16:00	04:29:00	04:40:00				03:44:00	00:02:00	01:49:00	05:36:00
04:57:00	02:28:00	04:50:00	05:46:00				03:42:00	00:49:00	03:35:00	00:37:00
04:56:00	04:54:00	18:55:00	19:14:00				03:41:00	01:18:00	04:43:00	03:18:00
04:56:00	04:55:00	19:03:00	20:30:00				03:40:00	02:10:00	23:45:00	03:24:00
04:56:00	02:32:00	19:07:00	21:04:00				03:40:00	04:37:00	00:27:00	05:56:00
04:55:00	04:38:00	19:20:00	22:14:00				03:40:00	05:11:00	01:13:00	06:01:00
04:54:00	04:40:00	20:20:00	22:16:00				03:39:00	05:15:00	00:17:00	21:37:00
04:54:00	19:43:00	20:45:00	22:17:00				03:39:00	05:49:00	01:25:00	23:00:00
04:53:00	20:09:00	21:53:00	23:04:00				03:39:00	00:39:00	01:28:00	00:06:00
04:53:00	21:28:00	00:09:00	00:25:00				03:38:00	02:00:00	02:21:00	00:33:00
04:53:00	05:01:00	05:23:00	00:46:00				03:37:00	03:50:00	23:31:00	01:32:00
04:51:00	19:36:00	05:25:00	03:50:00				03:37:00	04:56:00	03:53:00	04:39:00
04:51:00	02:49:00	19:06:00	03:55:00				03:36:00	05:03:00	04:30:00	04:42:00
04:51:00	23:51:00	22:45:00	04:10:00				03:35:00	05:15:00	22:09:00	20:50:00
04:50:00	21:57:00	03:23:00	04:35:00				03:35:00	05:20:00	00:23:00	22:19:00
04:50:00	03:00:00	03:28:00	05:01:00				03:34:00	05:51:00	23:23:00	22:57:00
04:49:00	04:10:00	19:05:00	05:33:00				03:34:00	01:54:00	01:23:00	23:03:00
04:49:00	04:33:00	19:50:00	19:01:00				03:33:00	01:24:00	02:12:00	23:31:00
04:48:00	04:37:00	21:51:00	19:03:00				03:32:00	01:30:00	02:41:00	23:48:00
04:47:00	05:06:00	23:22:00	21:40:00				03:32:00	01:34:00	03:09:00	00:38:00
04:47:00	19:06:00	00:38:00	22:34:00				03:32:00	01:49:00	03:20:00	00:42:00
04:46:00	19:09:00	01:57:00	22:35:00				03:31:00	02:53:00	03:22:00	00:44:00
04:45:00	19:14:00	02:13:00	22:37:00				03:31:00	03:14:00	03:51:00	01:47:00
04:45:00	19:20:00	02:27:00	00:06:00				03:30:00	04:00:00	04:10:00	02:37:00
04:45:00	19:54:00	02:29:00	00:44:00				03:30:00	04:24:00	04:40:00	02:48:00
04:44:00	20:22:00	02:49:00	02:07:00				03:29:00	04:26:00	04:59:00	04:04:00
04:44:00	20:30:00	03:11:00	02:24:00				03:29:00	05:03:00	05:42:00	04:45:00
04:44:00	22:34:00	03:24:00	04:44:00				03:29:00	05:09:00	02:39:00	05:22:00
04:44:00	01:06:00	03:31:00	05:54:00				03:28:00	05:28:00	03:04:00	05:42:00
04:43:00	01:37:00	03:37:00	19:10:00				03:28:00	05:34:00	03:49:00	20:40:00
04:43:00	01:56:00	03:50:00	19:31:00				03:28:00	05:50:00	05:11:00	20:58:00
04:42:00	02:02:00	04:24:00	19:40:00				03:27:00	20:37:00	05:13:00	21:38:00
04:42:00	02:07:00	19:32:00	19:45:00				03:27:00	20:39:00	23:33:00	21:45:00
04:41:00	02:11:00	19:34:00	19:52:00				03:27:00	21:58:00	00:33:00	22:00:00
04:41:00	02:34:00	20:09:00	20:06:00				03:27:00	22:08:00	02:24:00	22:08:00
04:40:00	02:37:00	20:14:00	20:31:00				03:27:00	22:10:00	04:47:00	22:19:00
04:40:00	02:42:00	20:17:00	20:36:00				03:26:00	22:41:00	05:16:00	23:23:00
04:40:00	02:50:00	20:24:00	22:15:00				03:26:00	23:35:00	05:18:00	00:43:00
04:40:00	02:55:00	20:59:00	23:19:00				03:26:00	23:37:00	03:50:00	00:48:00
04:40:00	03:11:00	23:17:00	23:31:00				03:26:00	02:23:00	04:34:00	01:33:00
04:39:00	03:14:00	00:55:00	23:33:00				03:26:00	03:57:00	05:12:00	01:42:00
04:39:00	04:04:00	19:01:00	23:50:00				03:25:00	22:44:00	05:20:00	02:10:00
04:38:00	04:08:00	19:03:00	02:02:00				03:25:00	05:17:00	05:24:00	02:37:00
04:38:00	04:31:00	19:06:00	02:50:00				03:25:00	22:17:00	05:49:00	03:31:00
04:38:00	04:39:00	19:09:00	03:01:00				03:25:00	00:04:00	02:13:00	04:58:00
04:37:00	04:45:00	19:39:00	04:24:00				03:24:00	01:20:00	03:45:00	05:13:00
04:37:00	18:58:00	20:34:00	05:23:00				03:24:00	01:35:00	05:22:00	06:07:00
04:36:00	18:59:00	20:52:00	18:57:00				03:24:00	02:32:00	23:43:00	06:12:00
04:35:00	19:15:00	23:23:00	19:03:00				03:22:00	02:46:00	01:49:00	20:36:00
04:35:00	20:29:00	23:41:00	19:11:00				03:22:00	02:51:00	02:18:00	20:39:00
04:35:00	21:39:00	02:07:00	19:28:00				03:22:00	03:02:00	02:39:00	20:55:00
04:34:00	03:28:00	03:41:00	19:29:00				03:21:00	03:40:00	02:59:00	21:57:00
04:33:00	22:19:00	03:53:00	20:03:00				03:21:00	04:01:00	03:04:00	22:20:00
04:33:00	01:19:00	04:26:00	22:15:00				03:20:00	05:26:00	03:46:00	22:24:00
04:33:00	01:27:00	05:26:00	23:47:00				03:19:00	05:29:00	03:50:00	23:07:00
04:33:00	03:14:00	05:31:00	03:48:00				03:18:00	05:55:00	04:39:00	23:37:00
04:32:00	03:15:00	05:36:00	05:05:00				03:18:00	02:10:00	04:49:00	23:48:00
04:31:00	03:49:00	19:00:00	05:33:00				03:17:00	23:04:00	05:22:00	00:18:00
04:31:00	04:06:00	19:03:00	05:46:00				03:17:00	23:10:00	05:24:00	00:40:00
04:30:00	19:17:00	19:29:00	18:58:00				03:17:00	02:22:00	05:50:00	00:58:00
04:30:00	19:19:00	19:05:00	19:32:00				03:16:00	04:02:00	05:52:00	02:44:00
04:30:00	19:22:00	22:33:00	00:13:00				03:16:00	04:43:00	22:08:00	03:55:00
04:29:00	19:33:00	20:11:00	03:37:00				03:16:00	04:50:00	02:14:00	05:42:00
04:29:00	20:59:00	23:15:00	03:52:00				03:14:00	05:04:00	04:32:00	06:10:00
04:28:00	23:57:00	23:35:00	04:21:00				03:14:00	05:18:00	05:13:00	22:02:00
04:28:00	00:43:00	01:09:00	05:32:00				03:14:00	22:00:00	05:47:00	22:32:00
04:28:00	00:53:00	05:21:00	05:34:00				03:13:00	23:26:00	01:50:00	23:07:00
04:28:00	00:58:00	05:23:00	18:43:00				03:13:00	01:51:00	02:01:00	23:13:00
04:27:00	02:49:00	20:50:00	18:50:00				03:13:00	02:05:00	02:45:00	23:37:00
04:26:00	02:51:00	21:12:00	18:52:00				03:12:00	02:12:00	03:25:00	00:09:00
04:26:00	04:35:00	00:01:00	19:03:00				03:12:00	02:48:00	04:30:00	02:18:00
04:26:00	00:05:00	00:19:00	19:10:00				03:11:00	05:12:00	05:30:00	02:54:00
04:26:00	20:51:00	01:43:00	19:22:00				03:11:00	05:19:00	05:05:00	02:58:00
04:25:00	04:53:00	02:21:00	19:57:00				03:11:00	05:20:00	00:59:00	03:27:00
04:25:00	00:38:00	04:32:00	20:45:00				03:11:00	05:29:00	01:50:00	03:53:00
04:25:00	03:50:00	19:18:00	20:47:00				03:10:00	05:30:00	02:16:00	04:01:00
04:24:00	21:29:00	00:08:00	21:19:00				03:10:00	22:51:00	03:32:00	05:25:00
04:24:00	23:25:00	03:27:00	21:52:00				03:09:00	23:55:00	01:18:00	03:20:00
04:24:00	00:19:00	19:34:00	22:15:00				03:09:00	00:39:00	01:37:00	22:52:00
04:23:00	02:25:00	20:19:00	22:16:00				03:09:00	00:54:00	01:39:00	22:56:00
04:23:00	00:16:00	21:45:00	01:06:00				03:09:00	01:15:00	01:58:00	23:26:00
04:23:00	02:00:00	22:13:00	02:08:00				03:09:00	04:08:00	02:40:00	00:46:00
04:22:00	02:02:00	23:21:00	02:10:00				03:08:00	05:27:00	03:11:00	02:24:00
04:22:00	02:03:00	23:57:00	04:20:00				03:07:00	05:45:00	03:25:00	02:53:00
04:21:00	02:43:00	01:50:00	05:27:00				03:07:00	00:12:00	03:30:00	04:41:00
04:21:00	02:43:00	02:02:00	05:48:00				03:06:00	01:16:00	04:10:00	05:55:00
04:21:00	02:44:00	02:21:00	19:00:00				03:06:00	01:32:00	05:00:00	06:00:00
04:20:00	03:32:00	19:46:00	19:02:00				03:05:00	01:46:00	05:15:00	23:21:00
04:20:00	03:33:00	22:14:00	19:07:00				03:05:00	01:57:00	05:30:00	02:11:00
04:20:00	03:34:00	00:05:00	19:09:00				03:05:00	02:40:00	01:07:00	05:25:00
04:20:00	03:35:00	02:30:00	19:10:00				03:04:00	05:12:00	04:06:00	05:40:00
04:20:00	03:36:00	03:07:00	19:21:00				03:02:00	03:50:00	04:47:00	05:44:00
04:19:00	03:38:00	03:10:00	19:23:00				03:02:00	05:07:00	20:50:00	05:49:00
04:19:00	03:39:00	04:23:00	20:02:00				03:02:00	05:08:00	23:51:00	06:01:00
04:19:00	04:38:00	04:34:00	20:14:00				03:01:00	23:13:00	03:56:00	06:06:00
04:18:00	04:39:00	04:54:00	20:33:00				03:00:00	00:49:00	05:14:00	22:31:00
04:16:00	04:40:00	04:57:00	20:46:00				02:59:00	05:30:00	05:18:00	23:38:00
04:16:00	04:47:00	05:09:00	20:48:00				02:57:00	01:30:00	05:36:00	01:42:00
04:16:00	20:16:00	19:50:00	20:50:00				02:57:00	01:43:00	02:14:00	04:35:00
04:15:00	20:53:00	01:38:00	20:59:00				02:56:00	01:45:00	05:17:00	05:39:00
04:15:00	20:55:00	04:46:00	21:39:00				02:56:00	02:28:00	05:22:00	01:09:00
04:15:00	21:21:00	19:30:00	22:00:00				02:56:00	02:37:00	00:47:00	22:38:00
04:15:00	02:37:00	23:00:00	22:33:00				02:56:00	04:02:00	01:53:00	03:22:00
04:14:00	04:38:00	19:44:00	23:36:00				02:56:00	04:12:00	02:46:00	04:01:00
04:13:00	05:27:00	20:02:00	23:46:00				02:55:00	04:15:00	02:49:00	05:45:00
04:13:00	20:41:00	21:32:00	00:34:00				02:54:00	04:17:00	03:15:00	21:22:00
04:13:00	19:07:00	21:48:00	01:20:00				02:54:00	04:19:00	03:52:00	23:14:00
04:13:00	19:11:00	22:59:00	03:05:00				02:54:00	04:21:00	20:58:00	00:03:00
04:13:00	19:38:00	01:11:00	03:13:00				02:54:00	04:47:00	00:01:00	00:12:00
04:13:00	20:02:00	01:19:00	03:17:00				02:54:00	04:52:00	00:41:00	02:01:00
04:11:00	21:03:00	19:03:00	03:44:00				02:54:00	05:42:00	00:45:00	02:43:00
04:11:00	21:07:00	19:55:00	04:06:00				02:52:00	22:05:00	02:39:00	03:36:00
04:11:00	22:05:00	20:31:00	04:11:00				02:52:00	22:33:00	04:09:00	04:58:00
04:10:00	22:08:00	22:21:00	04:26:00				02:52:00	22:38:00	05:26:00	05:00:00
04:10:00	22:43:00	22:34:00	05:18:00				02:51:00	23:07:00	03:55:00	05:27:00
04:10:00	22:46:00	22:53:00	18:45:00				02:51:00	23:24:00	04:25:00	05:29:00
04:09:00	23:09:00	00:26:00	19:49:00				02:51:00	00:12:00	04:37:00	20:23:00
04:09:00	23:14:00	00:42:00	18:55:00				02:51:00	00:21:00	05:09:00	21:09:00
04:09:00	23:55:00	01:33:00	19:09:00				02:51:00	00:23:00	05:17:00	21:15:00
04:09:00	00:58:00	05:09:00	19:13:00				02:51:00	00:37:00	03:08:00	21:55:00
04:08:00	01:02:00	05:13:00	19:19:00				02:50:00	02:01:00	03:55:00	23:00:00
04:07:00	01:31:00	19:04:00	20:25:00				02:49:00	02:08:00	04:59:00	23:12:00
04:07:00	01:49:00	19:07:00	20:55:00				02:49:00	02:52:00	05:39:00	23:54:00
04:07:00	02:17:00	19:32:00	21:39:00				02:49:00	03:02:00	02:07:00	01:17:00
04:06:00	02:35:00	20:26:00	03:13:00				02:48:00	04:21:00	02:50:00	01:37:00
04:05:00	02:42:00	20:31:00	19:00:00				02:48:00	05:58:00	04:42:00	04:12:00
04:05:00	02:50:00	21:42:00	19:05:00				02:47:00	05:46:00	05:21:00	05:20:00
04:05:00	02:52:00	22:17:00	19:16:00				02:47:00	00:22:00	05:51:00	05:21:00
04:04:00	02:57:00	22:20:00	19:48:00				02:46:00	23:50:00	05:53:00	05:30:00
04:04:00	03:03:00	22:31:00	20:32:00				02:44:00	00:30:00	23:21:00	05:47:00
04:04:00	03:21:00	22:38:00	21:19:00				02:44:00	00:49:00	23:37:00	20:22:00
04:04:00	03:31:00	00:08:00	22:35:00				02:44:00	00:59:00	23:59:00	21:06:00
04:04:00	03:55:00	01:40:00	22:37:00				02:44:00	01:38:00	00:16:00	21:56:00
04:04:00	04:06:00	02:26:00	00:31:00				02:44:00	03:39:00	02:55:00	22:31:00
04:02:00	04:08:00	03:15:00	00:45:00				02:43:00	02:54:00	03:09:00	22:42:00
04:01:00	04:09:00	03:18:00	00:50:00				02:42:00	03:23:00	03:28:00	22:44:00
04:00:00	04:12:00	03:20:00	03:09:00				02:42:00	03:28:00	03:44:00	23:00:00
04:00:00	04:15:00	04:03:00	03:29:00				02:41:00	03:41:00	04:02:00	23:18:00
04:00:00	04:22:00	04:28:00	04:37:00				02:40:00	04:17:00	04:34:00	23:43:00
03:59:00	04:41:00	04:31:00	04:59:00				02:40:00	04:20:00	04:36:00	00:09:00
03:58:00	05:06:00	05:25:00	05:52:00				02:40:00	04:22:00	04:38:00	00:36:00
03:58:00	05:11:00	19:11:00	20:52:00				02:40:00	04:32:00	04:51:00	01:53:00
03:58:00	05:26:00	03:46:00	23:49:00				02:39:00	04:59:00	05:28:00	03:03:00
03:57:00	20:13:00	01:41:00	00:44:00				02:39:00	05:10:00	05:50:00	03:29:00
03:55:00	21:41:00	02:10:00	01:11:00				02:38:00	05:12:00	22:45:00	03:42:00
03:55:00	22:32:00	21:18:00	19:11:00				02:37:00	05:17:00	01:25:00	03:49:00
03:53:00	23:32:00	21:21:00	20:57:00				02:37:00	05:32:00	01:27:00	03:55:00
03:53:00	23:46:00	22:07:00	22:39:00				02:37:00	00:50:00	03:18:00	04:00:00
03:52:00	00:38:00	22:20:00	23:23:00				02:35:00	01:34:00	04:14:00	04:16:00
03:51:00	03:06:00	23:23:00	02:53:00				02:35:00	03:41:00	04:22:00	04:49:00
03:51:00	05:14:00	00:25:00	04:03:00				02:34:00	04:30:00	04:23:00	04:51:00
03:51:00	19:32:00	01:02:00	18:56:00				02:34:00	04:55:00	22:16:00	05:03:00
03:51:00	21:30:00	01:07:00	19:02:00				02:33:00	04:57:00	22:20:00	05:11:00
03:51:00	00:29:00	01:11:00	19:08:00				02:32:00	05:11:00	23:30:00	05:17:00
03:51:00	01:17:00	01:48:00	20:20:00				02:32:00	05:14:00	23:33:00	05:40:00
03:49:00	01:22:00	02:05:00	21:35:00				02:32:00	05:29:00	01:01:00	05:46:00
03:49:00	02:06:00	05:05:00	23:16:00				02:31:00	05:31:00	01:33:00	05:59:00
03:49:00	02:21:00	19:10:00	01:06:00				02:31:00	05:33:00	01:55:00	21:09:00
03:49:00	02:26:00	19:17:00	03:15:00				02:30:00	05:35:00	02:45:00	21:24:00
03:48:00	04:25:00	19:54:00	03:40:00				02:30:00	00:38:00	03:00:00	22:13:00
03:48:00	04:27:00	20:36:00	19:16:00				02:29:00	04:46:00	03:05:00	22:40:00
03:48:00	05:14:00	21:02:00	20:14:00				02:29:00	05:27:00	03:11:00	22:59:00
03:48:00	05:33:00	21:41:00	20:24:00				02:28:00	20:41:00	03:13:00	23:31:00
03:47:00	19:31:00	22:57:00	23:53:00				02:28:00	01:09:00	03:48:00	23:35:00
03:47:00	20:09:00	23:26:00	00:51:00				02:28:00	01:31:00	04:13:00	23:52:00
03:46:00	20:15:00	23:58:00	01:09:00				02:28:00	01:41:00	04:54:00	23:53:00
03:46:00	21:21:00	01:14:00	03:00:00				02:27:00	02:13:00	04:58:00	00:16:00
03:45:00	21:37:00	02:24:00	03:22:00				02:27:00	02:48:00	05:03:00	00:36:00
03:45:00	22:07:00	02:57:00	04:02:00				02:27:00	02:59:00	05:11:00	01:04:00
03:44:00	23:37:00	03:01:00	04:14:00				02:26:00	03:03:00	05:20:00	01:15:00
03:44:00	00:07:00	03:38:00	04:25:00				02:26:00	03:11:00	20:32:00	02:02:00
03:43:00	00:10:00	04:01:00	04:45:00				02:26:00	03:13:00	20:35:00	02:26:00
03:42:00	00:23:00	04:41:00	05:11:00				02:26:00	04:10:00	20:40:00	02:46:00
03:41:00	00:44:00	20:54:00	05:31:00				02:25:00	04:31:00	21:02:00	02:52:00
03:41:00	00:52:00	22:00:00	20:30:00				02:24:00	04:44:00	21:37:00	03:43:00
03:40:00	01:29:00	03:23:00	00:03:00				02:24:00	04:56:00	21:39:00	04:23:00
03:40:00	02:03:00	03:50:00	00:42:00				02:23:00	05:26:00	22:00:00	04:27:00
03:39:00	02:35:00	19:20:00	00:53:00				02:23:00	05:27:00	22:52:00	04:57:00
03:39:00	05:05:00	20:14:00	02:24:00				02:22:00	05:32:00	00:14:00	05:31:00
03:39:00	00:16:00	20:34:00	03:24:00				02:22:00	00:06:00	00:25:00	05:37:00
03:39:00	00:45:00	01:40:00	03:29:00				02:22:00	00:08:00	00:52:00	05:20:00
03:38:00	01:29:00	01:41:00	03:58:00				02:22:00	00:31:00	02:32:00	22:01:00
03:38:00	02:46:00	02:11:00	05:39:00				02:22:00	01:02:00	02:53:00	23:36:00
03:38:00	05:06:00	02:59:00	21:09:00				02:21:00	01:05:00	03:35:00	01:23:00
03:37:00	05:09:00	03:43:00	23:19:00				02:21:00	01:16:00	03:45:00	02:34:00
03:37:00	04:46:00	19:19:00	00:03:00				02:21:00	02:05:00	03:47:00	03:25:00
03:36:00	01:36:00	19:44:00	00:25:00				02:20:00	02:31:00	05:49:00	04:17:00
03:35:00	04:45:00	20:21:00	04:16:00				02:20:00	02:59:00	22:28:00	04:54:00
03:35:00	05:04:00	20:26:00	18:59:00				02:20:00	04:34:00	22:57:00	05:38:00
03:34:00	05:13:00	22:55:00	19:05:00				02:20:00	05:06:00	23:24:00	06:05:00
03:34:00	20:09:00	23:01:00	20:24:00				02:19:00	02:08:00	00:08:00	22:42:00
03:33:00	21:08:00	23:44:00	21:22:00				02:19:00	02:12:00	00:37:00	23:19:00
03:33:00	21:26:00	02:04:00	22:42:00				02:18:00	02:40:00	00:41:00	00:40:00
03:33:00	21:57:00	03:52:00	23:17:00				02:18:00	03:00:00	03:17:00	05:13:00
03:33:00	23:15:00	04:38:00	23:41:00				02:18:00	03:38:00	04:25:00	05:28:00
03:32:00	01:40:00	04:42:00	01:45:00				02:17:00	04:39:00	05:06:00	05:38:00
03:31:00	01:59:00	04:45:00	03:20:00				02:17:00	04:42:00	22:35:00	06:08:00
03:30:00	02:01:00	05:03:00	05:25:00				02:16:00	05:06:00	23:40:00	20:38:00
03:29:00	04:09:00	05:16:00	19:03:00				02:14:00	01:44:00	01:31:00	23:05:00
03:28:00	04:27:00	05:18:00	19:06:00				02:14:00	02:30:00	04:26:00	23:26:00
03:27:00	05:05:00	21:08:00	20:12:00				02:14:00	05:17:00	05:04:00	00:22:00
03:26:00	00:57:00	21:56:00	20:14:00				02:13:00	23:18:00	05:16:00	00:53:00
03:26:00	01:02:00	23:00:00	23:02:00				02:12:00	01:35:00	05:19:00	01:09:00
03:26:00	01:37:00	02:21:00	00:03:00				02:12:00	04:06:00	05:30:00	03:25:00
03:26:00	04:35:00	02:22:00	00:28:00				02:10:00	04:09:00	05:42:00	03:29:00
03:25:00	22:39:00	19:35:00	01:06:00				02:10:00	05:04:00	00:22:00	04:01:00
03:25:00	23:52:00	19:59:00	02:57:00				02:09:00	05:06:00	03:11:00	04:43:00
03:24:00	00:59:00	20:07:00	03:51:00				02:09:00	05:39:00	03:35:00	05:07:00
03:23:00	01:27:00	21:23:00	04:45:00				02:09:00	03:20:00	05:04:00	05:10:00
03:23:00	02:52:00	21:38:00	05:27:00				02:08:00	03:52:00	20:52:00	05:45:00
03:21:00	04:48:00	23:13:00	05:40:00				02:07:00	23:38:00	22:36:00	05:54:00
03:20:00	04:59:00	23:38:00	05:52:00				02:07:00	23:40:00	23:29:00	05:58:00
03:20:00	20:42:00	00:44:00	19:08:00				02:06:00	03:41:00	00:57:00	02:00:00
03:18:00	21:58:00	00:46:00	19:20:00				02:04:00	04:35:00	01:19:00	05:45:00
03:18:00	20:44:00	03:29:00	19:28:00				02:01:00	05:19:00	02:23:00	05:50:00
03:18:00	21:08:00	03:48:00	19:37:00				02:01:00	05:32:00	02:41:00	05:55:00
03:18:00	22:38:00	04:19:00	19:58:00				02:01:00	05:34:00	03:17:00	21:51:00
03:17:00	00:01:00	04:31:00	21:14:00				02:01:00	22:45:00	03:21:00	23:08:00
03:17:00	00:26:00	19:00:00	21:28:00				02:00:00	01:10:00	04:01:00	00:52:00
03:17:00	01:19:00	19:33:00	22:22:00				01:59:00	02:08:00	21:46:00	01:15:00
03:16:00	03:22:00	20:37:00	23:29:00				01:58:00	02:29:00	02:47:00	01:51:00
03:16:00	03:25:00	20:43:00	23:30:00				01:58:00	03:55:00	04:34:00	02:39:00
03:16:00	04:35:00	22:01:00	23:41:00				01:57:00	04:12:00	05:22:00	04:27:00
03:16:00	04:41:00	22:10:00	00:26:00				01:57:00	04:38:00	21:08:00	04:38:00
03:16:00		22:56:00	01:05:00				01:57:00	05:22:00	23:46:00	05:00:00
03:14:00		23:07:00	02:25:00				01:56:00	20:53:00	00:29:00	05:02:00
03:14:00		23:09:00	02:57:00				01:56:00	20:57:00	01:21:00	05:10:00
03:14:00		00:22:00	03:00:00				01:55:00	21:07:00	02:38:00	05:12:00
03:14:00		00:38:00	03:48:00				01:55:00	21:19:00	03:59:00	05:39:00
03:13:00		01:52:00	03:50:00				01:55:00	21:46:00	04:23:00	05:46:00
03:13:00		02:17:00	04:00:00				01:54:00	23:08:00	04:46:00	05:48:00
03:11:00		02:47:00	04:12:00				01:54:00	23:11:00	05:22:00	23:22:00
03:10:00		03:37:00	04:21:00				01:54:00	23:50:00	05:26:00	00:38:00
03:10:00		04:44:00	04:40:00				01:54:00	23:53:00	05:34:00	05:02:00
03:09:00		04:49:00	04:48:00				01:53:00	00:16:00	05:49:00	05:34:00
03:09:00		05:26:00	04:51:00				01:52:00	00:18:00	21:14:00	20:37:00
03:09:00		19:07:00	05:08:00				01:51:00	00:54:00	22:00:00	23:20:00
03:08:00		19:10:00	05:10:00				01:51:00	01:06:00	22:19:00	23:26:00
03:08:00		19:35:00	05:19:00				01:50:00	01:08:00	22:33:00	23:47:00
03:07:00		19:45:00	18:52:00				01:50:00	01:10:00	22:48:00	01:10:00
03:07:00		21:49:00	18:53:00				01:50:00	01:11:00	23:54:00	01:13:00
03:06:00		22:14:00	18:55:00				01:49:00	01:16:00	01:23:00	01:23:00
03:06:00		22:22:00	18:58:00				01:49:00	03:40:00	02:05:00	02:00:00
03:05:00		22:44:00	19:04:00				01:48:00	04:04:00	02:30:00	02:03:00
03:03:00		23:29:00	19:07:00				01:47:00	04:55:00	02:36:00	02:59:00
03:03:00		00:06:00	19:31:00				01:46:00	05:22:00	03:05:00	03:32:00
03:02:00		00:11:00	20:35:00				01:46:00	22:32:00	03:33:00	04:03:00
03:01:00		01:04:00	21:09:00				01:46:00	22:23:00	04:15:00	04:09:00
03:01:00		01:01:00	21:17:00				01:46:00	22:57:00	04:29:00	04:13:00
03:00:00		01:13:00	22:28:00				01:45:00	23:22:00	04:44:00	04:20:00
02:58:00		01:19:00	23:05:00				01:44:00	23:41:00	05:01:00	04:25:00
02:58:00		01:51:00	00:05:00				01:42:00	00:50:00	05:30:00	04:40:00
02:58:00		02:07:00	04:41:00				01:40:00	01:11:00	05:31:00	04:54:00
02:57:00		02:09:00	18:50:00				01:39:00	01:51:00	05:48:00	05:08:00
02:57:00		02:44:00	18:58:00				01:37:00	01:56:00	23:55:00	05:13:00
02:57:00		04:02:00	19:03:00				01:37:00	02:17:00	23:58:00	20:28:00
02:56:00		04:23:00	21:02:00				01:37:00	02:19:00	01:54:00	20:46:00
02:55:00		04:55:00	23:07:00				01:36:00	02:27:00	02:07:00	20:50:00
02:55:00		05:18:00	23:20:00				01:36:00	02:42:00	02:28:00	21:21:00
02:54:00		23:33:00	00:22:00				01:35:00	03:41:00	02:55:00	21:32:00
02:53:00		01:31:00	01:52:00				01:35:00	04:36:00	03:05:00	21:40:00
02:53:00		01:57:00	22:25:00				01:34:00	04:51:00	03:07:00	22:39:00
02:53:00		05:18:00	00:06:00				01:34:00	05:18:00	03:12:00	22:51:00
02:53:00		19:50:00	02:44:00				01:34:00	05:20:00	04:36:00	23:50:00
02:53:00		02:26:00	05:46:00				01:34:00	05:20:00	05:01:00	00:19:00
02:53:00		03:43:00	05:50:00				01:34:00	05:39:00	05:37:00	00:29:00
02:53:00		03:53:00	18:57:00				01:34:00	20:32:00	21:29:00	00:38:00
02:52:00		04:00:00	19:02:00				01:34:00	20:34:00	22:21:00	00:52:00
02:51:00		04:21:00	19:29:00				01:34:00	20:49:00	22:32:00	01:46:00
02:51:00		04:48:00	20:35:00				01:33:00	00:48:00	23:59:00	02:15:00
02:50:00		05:01:00	20:56:00				01:30:00	00:56:00	00:58:00	02:28:00
02:50:00		05:15:00	21:33:00				01:30:00	01:10:00	02:03:00	03:31:00
02:50:00		23:33:00	23:44:00				01:28:00	02:31:00	03:09:00	04:22:00
02:49:00		00:16:00	00:03:00				01:27:00	02:56:00	04:25:00	04:37:00
02:48:00		01:22:00	00:35:00				01:27:00	03:49:00	04:46:00	04:49:00
02:48:00		01:43:00	00:43:00				01:26:00	03:58:00	21:15:00	04:55:00
02:48:00		02:12:00	01:50:00				01:26:00	04:10:00	22:15:00	05:06:00
02:48:00		02:22:00	02:46:00				01:26:00	20:38:00	02:52:00	05:36:00
02:48:00		02:35:00	05:40:00				01:25:00	20:42:00	03:15:00	05:41:00
02:48:00		04:16:00	05:42:00				01:24:00	21:38:00	03:37:00	05:45:00
02:47:00		19:23:00	19:01:00				01:23:00	21:29:00	04:03:00	20:44:00
02:47:00		20:44:00	19:06:00				01:23:00	22:34:00	04:22:00	21:15:00
02:46:00		21:22:00	19:12:00				01:23:00	23:12:00	05:04:00	00:38:00
02:46:00		22:31:00	19:19:00				01:23:00	23:22:00	05:36:00	01:25:00
02:45:00		23:38:00	19:28:00				01:23:00	00:48:00	20:21:00	02:27:00
02:45:00		00:20:00	19:31:00				01:22:00	01:48:00	20:29:00	02:33:00
02:45:00		01:59:00	19:46:00				01:20:00	01:59:00	21:00:00	02:48:00
02:45:00		02:44:00	20:04:00				01:20:00	02:03:00	21:32:00	03:09:00
02:44:00		03:02:00	20:08:00				01:18:00	03:54:00	22:09:00	03:14:00
02:44:00		19:11:00	20:29:00				01:18:00	03:56:00	22:17:00	04:44:00
02:44:00		19:19:00	20:56:00				01:16:00	04:16:00	22:55:00	04:50:00
02:44:00		20:18:00	21:22:00				01:16:00	04:31:00	23:25:00	04:54:00
02:43:00		20:23:00	21:39:00				01:14:00	00:50:00	00:50:00	05:35:00
02:42:00		20:48:00	22:07:00				01:14:00	01:00:00	01:03:00	23:40:00
02:41:00		21:35:00	22:09:00				01:14:00	01:10:00	02:32:00	02:09:00
02:41:00		00:05:00	00:53:00				01:14:00	01:14:00	04:54:00	00:48:00
02:40:00		00:26:00	01:10:00				01:12:00	01:52:00	05:04:00	01:54:00
02:39:00		01:38:00	01:40:00				01:11:00	02:26:00	05:06:00	02:19:00
02:39:00		01:42:00	04:13:00				01:11:00	02:56:00	05:07:00	02:21:00
02:39:00		03:51:00	05:50:00				01:09:00	03:28:00	05:08:00	02:38:00
02:39:00		00:35:00	18:53:00				01:09:00	03:54:00	05:09:00	04:37:00
02:38:00		01:36:00	19:10:00				01:09:00	04:16:00	05:29:00	04:41:00
02:37:00		01:56:00	19:25:00				01:09:00	05:20:00	05:31:00	05:25:00
02:37:00		03:11:00	20:26:00				01:08:00	20:43:00	05:35:00	05:33:00
02:36:00		03:42:00	23:33:00				01:07:00	20:43:00	01:57:00	05:44:00
02:36:00		03:45:00	23:50:00				01:06:00	20:49:00	02:38:00	05:58:00
02:33:00		04:01:00	00:51:00				01:05:00	21:14:00	04:51:00	21:24:00
02:32:00		05:09:00	01:21:00				01:03:00	21:47:00	05:03:00	21:33:00
02:31:00		19:42:00	04:53:00				01:03:00	22:00:00	05:29:00	01:14:00
02:31:00		20:08:00	05:45:00				01:02:00	23:36:00	05:43:00	03:27:00
02:30:00		21:23:00	18:57:00				01:00:00	23:46:00	21:28:00	03:51:00
02:30:00		23:02:00	19:40:00				01:00:00	02:21:00	22:18:00	04:00:00
02:30:00		23:16:00	20:56:00				01:00:00	02:39:00	00:14:00	04:32:00
02:30:00		23:19:00	22:13:00				00:59:00	03:08:00	02:30:00	04:43:00
02:30:00		03:59:00	22:32:00				00:54:00	03:27:00	02:50:00	05:39:00
02:30:00		04:10:00	22:56:00				00:54:00	03:37:00	03:55:00	02:34:00
02:29:00		04:26:00	00:11:00				00:53:00	03:49:00	05:34:00	02:41:00
02:29:00		05:01:00	00:31:00				00:53:00	04:11:00	01:10:00	03:06:00
02:29:00		05:06:00	00:34:00				00:52:00	04:51:00	02:24:00	03:33:00
02:28:00		05:11:00	03:23:00				00:52:00	05:19:00	05:14:00	04:09:00
02:28:00		01:27:00	03:47:00				00:51:00	05:24:00	05:16:00	04:42:00
02:28:00		04:49:00	05:20:00				00:51:00	20:41:00	05:17:00	04:54:00
02:28:00		18:59:00	18:54:00				00:51:00	21:58:00	03:18:00	05:13:00
02:27:00		20:15:00	18:56:00				00:51:00	22:39:00		05:16:00
02:27:00		22:20:00	19:01:00				00:50:00	23:31:00		05:18:00
02:27:00		00:56:00	19:11:00				00:50:00	23:43:00		05:50:00
02:26:00		03:28:00	19:15:00				00:50:00	01:12:00		03:00:00
02:26:00		03:50:00	19:37:00				00:49:00	01:20:00		04:44:00
02:25:00		04:04:00	19:57:00				00:49:00	01:36:00		05:22:00
02:24:00		04:57:00	20:37:00				00:47:00	01:41:00		05:30:00
02:24:00		04:59:00	21:56:00				00:47:00	03:15:00		00:42:00
02:24:00		05:06:00	22:05:00				00:46:00	03:38:00		03:02:00
02:24:00		05:20:00	00:21:00				00:44:00	04:25:00		04:26:00
02:24:00		05:23:00	00:44:00				00:44:00	21:38:00		04:44:00
02:24:00		19:09:00	02:36:00				00:44:00	22:42:00		22:29:00
02:23:00		19:25:00	03:37:00				00:42:00	23:15:00		23:17:00
02:22:00		20:34:00	05:28:00				00:42:00	23:42:00		23:41:00
02:22:00		23:43:00	18:45:00				00:42:00	02:52:00		23:43:00
02:22:00		00:31:00	18:58:00				00:41:00	03:19:00		01:18:00
02:22:00		02:11:00	19:27:00				00:41:00	03:42:00		02:07:00
02:22:00		04:11:00	19:37:00				00:41:00	03:55:00		02:55:00
02:21:00		05:12:00	20:09:00				00:40:00	04:00:00		03:10:00
02:20:00		20:00:00	21:10:00				00:40:00	04:10:00		03:36:00
02:19:00		20:34:00	23:56:00				00:40:00	04:43:00		03:38:00
02:18:00		23:03:00	01:57:00				00:38:00	05:00:00		03:44:00
02:18:00		23:36:00	19:03:00				00:37:00	23:44:00		04:47:00
02:16:00		00:36:00	19:04:00				00:37:00	04:26:00		05:07:00
02:16:00		00:54:00	19:07:00				00:36:00	04:26:00		05:23:00
02:16:00		03:33:00	19:13:00				00:36:00	04:32:00		05:39:00
02:16:00		05:26:00	19:24:00				00:36:00	05:00:00		06:07:00
02:16:00		02:01:00	19:49:00				00:34:00	05:19:00		20:54:00
02:15:00		04:39:00	20:10:00				00:33:00	05:23:00		03:58:00
02:15:00		05:23:00	20:20:00				00:30:00	22:08:00		04:01:00
02:15:00		20:11:00	20:24:00				00:30:00	22:16:00		04:18:00
02:14:00		20:56:00	21:54:00				00:29:00	22:37:00		04:56:00
02:13:00		23:23:00	22:45:00				00:29:00	23:31:00		05:37:00
02:13:00		00:33:00	23:14:00				00:29:00	23:33:00		05:40:00
02:12:00		03:37:00	23:35:00				00:28:00	02:50:00		20:39:00
02:10:00		04:40:00	02:03:00				00:28:00	03:12:00		21:01:00
02:09:00		04:50:00	05:26:00				00:28:00	03:38:00		21:08:00
02:09:00		21:59:00	05:30:00				00:28:00	03:57:00		22:40:00
02:08:00		22:38:00	05:41:00				00:28:00	23:52:00		23:51:00
02:08:00		02:20:00	18:53:00				00:27:00	03:35:00		01:10:00
02:08:00		03:26:00	18:59:00				00:27:00	04:03:00		01:42:00
02:08:00		19:33:00	19:02:00				00:27:00	04:42:00		02:05:00
02:08:00		21:50:00	19:09:00				00:26:00	21:49:00		02:14:00
02:07:00		22:17:00	19:22:00				00:25:00	22:02:00		02:39:00
02:06:00		22:36:00	19:36:00				00:24:00	22:13:00		02:50:00
02:04:00		23:46:00	19:43:00				00:24:00	22:24:00		03:43:00
02:04:00		00:01:00	19:52:00				00:23:00	23:03:00		03:51:00
02:04:00		01:04:00	20:24:00				00:23:00	23:59:00		03:57:00
02:04:00		01:07:00	20:42:00				00:23:00	02:19:00		04:01:00
02:03:00		01:46:00	21:13:00				00:23:00	02:54:00		04:07:00
02:03:00		01:55:00	21:27:00				00:22:00	05:18:00		04:12:00
02:02:00		02:42:00	21:29:00				00:21:00	05:21:00		04:24:00
02:02:00		03:12:00	22:35:00				00:21:00	05:24:00		04:28:00
02:02:00		03:20:00	23:50:00				00:21:00	20:35:00		04:51:00
01:59:00		03:22:00	00:57:00				00:20:00	20:39:00		05:22:00
01:58:00		03:20:00	01:13:00				00:19:00	22:43:00		05:23:00
01:56:00		19:17:00	01:54:00				00:19:00	22:46:00		05:28:00
01:56:00		20:00:00	02:46:00				00:19:00	23:34:00		20:20:00
01:55:00		21:04:00	03:01:00				00:16:00	01:03:00		20:23:00
01:55:00		22:06:00	03:41:00				00:16:00	01:33:00		20:35:00
01:52:00		22:07:00	04:26:00				00:14:00	01:40:00		20:39:00
01:51:00		22:55:00	18:55:00				00:14:00	03:54:00		20:58:00
01:51:00		23:16:00	18:57:00				00:13:00	21:01:00		22:57:00
01:50:00		23:32:00	19:16:00				00:12:00	00:19:00		01:06:00
01:49:00		00:35:00	19:31:00				00:12:00	22:57:00		01:12:00
01:49:00		02:32:00	21:41:00				00:12:00	03:41:00		01:30:00
01:49:00		02:44:00	21:54:00				00:11:00	20:57:00		01:51:00
01:47:00		02:52:00	01:23:00				00:10:00	22:48:00		02:01:00
01:46:00		04:06:00	18:51:00				00:09:00	00:05:00		02:08:00
01:46:00			19:02:00				00:09:00	01:22:00		02:24:00
01:46:00			21:39:00				00:08:00	03:20:00		03:13:00
01:46:00			00:19:00				00:08:00	03:28:00		03:30:00
01:45:00			01:28:00				00:08:00	03:30:00		03:39:00
01:43:00			02:02:00				00:07:00	05:02:00		03:46:00
01:42:00			04:16:00				00:05:00	05:17:00		03:56:00
01:42:00			05:32:00				00:05:00	20:57:00		04:14:00
01:41:00			19:01:00				00:04:00	21:35:00		04:20:00
01:41:00			19:07:00				00:02:00	21:47:00		04:28:00
01:41:00			19:40:00				00:02:00	02:39:00		04:51:00
01:41:00			21:16:00				00:01:00	03:21:00		04:52:00
01:41:00			23:48:00				00:01:00	03:30:00		04:54:00
01:40:00			02:23:00				00:00:00	04:05:00		05:07:00
01:40:00			05:14:00					21:41:00		05:10:00
01:38:00			19:24:00					22:34:00		05:20:00
01:37:00			20:19:00					23:57:00		05:55:00
01:36:00			21:06:00					01:50:00		20:34:00
01:36:00			21:26:00					04:40:00		22:26:00
01:35:00			22:54:00					04:52:00		23:47:00
01:35:00			00:33:00					05:33:00		00:13:00
01:35:00			01:50:00					21:47:00		00:15:00
01:34:00			04:45:00					23:17:00		03:47:00
01:34:00			05:48:00					00:09:00		04:10:00
01:33:00			19:10:00					02:04:00		04:25:00
01:33:00			19:18:00					03:21:00		04:35:00
01:33:00			19:58:00					04:56:00		05:28:00
01:33:00			21:45:00					20:43:00		20:24:00
01:32:00			05:02:00					21:25:00		21:21:00
01:32:00			19:03:00					20:03:00		22:29:00
01:31:00			19:16:00					00:16:00		23:44:00
01:30:00			20:35:00					04:04:00		23:53:00
01:30:00			21:54:00					04:58:00		01:21:00
01:30:00			00:14:00					05:08:00		02:17:00
01:30:00			01:30:00					05:33:00		03:29:00
01:29:00			01:38:00					20:41:00		03:48:00
01:29:00			18:44:00					01:32:00		03:54:00
01:29:00			18:49:00					03:00:00		03:55:00
01:28:00			19:02:00					04:02:00		04:04:00
01:27:00			19:21:00					21:25:00		04:09:00
01:27:00			19:22:00					02:31:00		04:25:00
01:23:00			19:56:00					02:32:00		04:34:00
01:23:00			00:34:00					04:13:00		04:37:00
01:23:00			02:53:00					05:11:00		04:41:00
01:23:00			04:35:00					20:40:00		04:57:00
01:21:00			05:52:00					20:57:00		05:01:00
01:21:00			19:23:00					21:22:00		05:46:00
01:21:00			19:42:00					21:36:00		20:34:00
01:20:00			21:08:00					23:21:00		21:00:00
01:19:00			21:27:00					00:53:00		22:31:00
01:19:00			21:45:00					01:21:00		22:47:00
01:19:00			00:32:00					02:24:00		01:21:00
01:18:00			19:04:00					03:03:00		02:18:00
01:17:00			19:10:00					20:36:00		02:20:00
01:17:00			19:20:00					20:42:00		02:23:00
01:17:00			19:32:00					20:54:00		03:03:00
01:16:00			19:43:00					22:53:00		04:08:00
01:16:00			19:57:00					22:55:00		04:14:00
01:16:00			20:14:00					23:17:00		04:17:00
01:16:00			20:23:00					00:14:00		04:27:00
01:15:00			20:40:00					01:22:00		04:57:00
01:15:00			20:56:00					01:37:00		04:59:00
01:15:00			21:32:00					02:14:00		05:07:00
01:15:00			21:47:00					02:18:00		05:11:00
01:14:00			00:35:00					03:06:00		05:24:00
01:13:00			00:57:00					03:24:00		05:27:00
01:12:00			01:12:00					05:11:00		05:29:00
01:10:00			02:23:00					20:28:00		05:31:00
01:10:00			02:43:00					20:59:00		20:43:00
01:10:00			03:51:00					22:21:00		20:56:00
01:09:00			04:54:00					22:46:00		22:38:00
01:09:00			19:02:00					00:40:00		01:08:00
01:06:00			19:20:00					02:15:00		01:40:00
01:05:00			20:00:00					02:17:00		01:48:00
01:05:00			20:17:00					03:39:00		02:25:00
01:05:00			20:36:00					04:34:00		03:35:00
01:04:00			21:37:00					05:29:00		03:47:00
01:03:00			21:40:00					20:47:00		04:09:00
01:01:00			23:34:00					20:54:00		04:19:00
01:01:00			00:40:00					21:25:00		04:22:00
00:59:00			03:25:00					23:04:00		04:31:00
00:59:00			04:41:00					00:18:00		04:37:00
00:59:00			05:22:00					01:14:00		04:47:00
00:58:00			18:51:00					01:55:00		05:19:00
00:57:00			19:01:00					02:22:00		05:21:00
00:57:00			19:14:00					04:40:00		05:24:00
00:55:00			19:16:00					05:06:00		05:41:00
00:55:00			19:29:00					05:27:00		06:11:00
00:55:00			19:34:00					20:34:00		20:44:00
00:54:00			20:01:00					21:38:00		00:32:00
00:53:00			21:00:00					01:14:00		02:56:00
00:53:00			21:42:00					02:07:00		03:15:00
00:53:00			22:32:00					02:47:00		03:51:00
00:50:00			23:28:00					04:09:00		03:54:00
00:50:00			00:58:00					04:10:00		04:02:00
00:50:00			01:17:00					04:11:00		04:14:00
00:49:00			01:48:00					20:51:00		04:24:00
00:48:00			04:06:00					20:55:00		05:46:00
00:48:00			04:34:00					20:58:00		05:51:00
00:47:00			04:57:00					22:35:00		20:32:00
00:46:00			05:04:00					02:50:00		20:53:00
00:45:00			05:09:00					02:53:00		21:03:00
00:43:00			05:25:00					05:01:00		01:51:00
00:41:00			05:28:00					05:17:00		01:53:00
00:41:00			18:50:00					05:19:00		03:50:00
00:41:00			19:00:00					20:57:00		04:00:00
00:40:00			19:03:00					21:06:00		04:01:00
00:39:00			19:11:00					21:14:00		04:16:00
00:37:00			19:15:00					21:33:00		04:38:00
00:37:00			19:20:00					22:48:00		04:41:00
00:37:00			19:34:00					00:07:00		05:07:00
00:36:00			19:51:00					01:13:00		05:13:00
00:34:00			19:54:00					02:54:00		05:45:00
00:34:00			20:23:00					03:15:00		05:49:00
00:32:00			20:25:00					04:49:00		03:33:00
00:32:00			21:59:00					05:13:00		03:55:00
00:32:00			22:24:00					05:35:00		04:19:00
00:28:00			23:09:00					20:41:00		04:26:00
00:27:00			00:25:00					20:56:00		04:31:00
00:27:00			00:58:00					20:56:00		04:32:00
00:23:00			01:13:00					20:59:00		04:33:00
00:23:00			01:29:00					21:07:00		04:39:00
00:22:00			01:38:00					22:27:00		04:54:00
00:22:00			01:59:00					22:43:00		05:00:00
00:22:00			02:10:00					03:23:00		05:00:00
00:22:00			02:24:00					03:58:00		05:41:00
00:21:00			05:03:00					05:09:00		05:46:00
00:20:00			05:09:00					20:39:00		06:01:00
00:19:00			05:26:00					01:04:00		06:06:00
00:19:00			19:21:00					02:06:00		20:18:00
00:17:00			21:21:00					03:21:00		20:55:00
00:17:00			21:44:00					05:21:00		21:44:00
00:17:00			21:56:00					20:57:00		21:53:00
00:17:00			01:30:00					21:25:00		21:59:00
00:16:00			02:12:00					21:26:00		22:26:00
00:15:00			02:33:00					23:26:00		22:28:00
00:15:00			03:03:00					01:47:00		22:34:00
00:13:00			03:30:00					04:44:00		22:59:00
00:12:00			03:38:00					20:32:00		23:15:00
00:12:00			04:33:00					20:33:00		23:35:00
00:11:00			05:02:00					20:45:00		00:36:00
00:11:00			05:04:00					20:51:00		00:59:00
00:09:00			05:12:00					21:29:00		03:36:00
00:09:00			05:15:00					22:36:00		03:46:00
00:08:00			05:26:00					23:03:00		20:40:00
00:07:00			19:58:00					23:40:00		21:50:00
00:06:00			02:45:00					00:52:00		21:55:00
00:05:00			03:31:00					02:39:00		22:03:00
00:05:00			04:59:00					04:25:00		22:12:00
00:05:00			05:26:00					20:34:00		22:19:00
00:04:00			05:39:00					20:42:00		22:24:00
00:04:00			05:45:00					21:15:00		22:35:00
00:04:00			05:47:00					21:34:00		22:57:00
00:04:00			18:46:00					22:28:00		23:06:00
00:03:00			18:52:00					23:28:00		23:14:00
00:02:00			18:54:00					00:26:00		23:31:00
00:01:00			19:06:00					01:22:00		23:42:00
00:01:00			19:25:00					04:31:00		00:00:00
00:00:00			20:05:00					20:43:00		03:14:00
00:00:00			20:21:00					21:00:00		03:27:00
00:00:00			20:47:00					21:25:00		04:29:00
00:00:00			21:15:00					22:03:00		05:29:00
			21:19:00					23:22:00		20:26:00
			21:57:00					01:13:00		20:28:00
			22:05:00					04:10:00		20:32:00
			22:14:00					04:12:00		20:34:00
			22:26:00					05:09:00		20:36:00
			22:31:00					20:39:00		20:38:00
			23:45:00					20:40:00		20:51:00
			02:34:00					20:46:00		20:54:00
			02:37:00					20:53:00		21:07:00
			03:53:00					21:09:00		21:09:00
			20:27:00					21:16:00		21:28:00
			21:43:00					21:39:00		21:43:00
			21:52:00					22:49:00		21:59:00
			22:52:00					23:00:00		22:03:00
			23:03:00					23:37:00		22:10:00
			23:13:00					00:40:00		22:20:00
			23:16:00					01:19:00		22:38:00
			23:35:00					04:42:00		22:50:00
			23:41:00					05:01:00		23:01:00
			00:14:00					05:29:00		23:06:00
			00:51:00					20:44:00		23:19:00
			01:03:00					20:47:00		23:22:00
			01:24:00					20:50:00		23:46:00
			01:39:00					21:37:00		23:53:00
			01:56:00					23:35:00		00:09:00
			03:09:00					00:03:00		00:29:00
			05:51:00					00:57:00		00:41:00
			19:03:00					01:48:00		02:17:00
			01:05:00					04:24:00		03:10:00
			03:51:00					05:33:00		03:49:00
			05:28:00					05:35:00		05:41:00
			05:43:00					20:38:00		20:16:00
			19:05:00					20:38:00		20:27:00
			02:46:00					20:44:00		20:33:00
			04:51:00					20:51:00		20:35:00
			05:16:00					20:55:00		20:39:00
			05:19:00					20:58:00		20:43:00
			19:16:00					21:06:00		20:46:00
			19:18:00					21:20:00		20:48:00
			19:20:00					21:49:00		20:55:00
			20:02:00					23:08:00		21:00:00
			23:05:00					23:46:00		21:17:00
			23:33:00					04:37:00		21:31:00
			23:43:00					05:30:00		21:47:00
			23:58:00					20:46:00		22:19:00
			00:27:00					21:07:00		22:34:00
			01:06:00					23:48:00		22:47:00
			03:58:00					01:36:00		22:55:00
			19:03:00					04:57:00		23:15:00
			19:08:00					20:39:00		00:01:00
			19:33:00					20:56:00		00:15:00
			21:37:00					21:11:00		00:23:00
			00:38:00					21:25:00		00:38:00
			04:25:00					22:05:00		02:00:00
			05:00:00					01:08:00		03:38:00
			05:19:00					02:21:00		03:57:00
			18:50:00					02:23:00		04:00:00
			19:00:00							04:26:00
			19:57:00							05:36:00
			21:10:00							20:36:00
			00:19:00							20:51:00
			00:56:00							21:01:00
			18:52:00							21:20:00
			18:56:00							21:23:00
			19:16:00							21:31:00
			19:18:00							22:04:00
			19:58:00							22:09:00
			20:02:00							22:25:00
			20:54:00							22:57:00
			21:31:00							23:06:00
			22:13:00							23:12:00
			23:45:00							23:17:00
			01:01:00							23:42:00
			01:52:00							00:30:00
			04:27:00							00:51:00
			05:05:00							03:26:00
			05:19:00							03:33:00
			05:24:00							04:05:00
			05:32:00							05:19:00
			19:15:00							20:36:00
			19:19:00							20:45:00
			20:08:00							21:13:00
			20:54:00							21:39:00
			22:40:00							21:51:00
			22:53:00							22:04:00
			23:01:00							22:09:00
			00:08:00							22:25:00
			00:35:00							22:51:00
			01:05:00							22:58:00
			02:21:00							23:08:00
			02:46:00							23:25:00
			03:46:00							00:05:00
			05:15:00							00:23:00
			05:32:00							00:42:00
			19:00:00							00:58:00
			19:08:00							03:46:00
			20:19:00							05:04:00
			20:36:00							05:17:00
			21:06:00							05:41:00
			21:42:00							20:23:00
			21:53:00							20:35:00
			22:23:00							20:48:00
			22:25:00							20:51:00
			23:02:00							21:01:00
			23:58:00							21:28:00
			00:06:00							21:50:00
			00:47:00							21:53:00
			01:05:00							22:03:00
			01:19:00							22:09:00
			01:31:00							22:12:00
			01:33:00							22:19:00
			02:46:00							22:25:00
			03:31:00							22:57:00
			04:41:00							23:01:00
			05:06:00							23:09:00
			05:15:00							23:11:00
			00:15:00							23:28:00
			03:39:00							23:37:00
			04:33:00							23:50:00
			04:36:00							00:21:00
			19:03:00							00:36:00
			19:14:00							00:38:00
			21:30:00							00:45:00
			21:46:00							02:12:00
			21:48:00							02:17:00
			22:06:00							02:30:00
			23:00:00							03:20:00
			23:17:00							03:26:00
			23:26:00							03:40:00
			00:33:00							04:13:00
			01:06:00							04:41:00
			01:21:00							04:59:00
			03:02:00							05:03:00
			03:40:00							05:10:00
			04:34:00							05:12:00
			05:12:00							05:14:00
			05:35:00							20:18:00
			05:46:00							21:34:00
			18:48:00							21:41:00
			18:56:00							21:55:00
			19:12:00							22:05:00
			19:32:00							22:24:00
			19:45:00							22:48:00
			19:55:00							22:57:00
			19:59:00							23:30:00
			20:26:00							23:38:00
			20:37:00							00:03:00
			02:54:00							00:16:00
			20:57:00							00:40:00
			20:59:00							00:48:00
			21:33:00							00:56:00
			21:36:00							03:35:00
			21:44:00							04:00:00
			21:51:00							05:24:00
			21:56:00							05:33:00
			21:58:00							05:39:00
			22:05:00							20:25:00
			22:07:00							20:27:00
			22:10:00							21:25:00
			22:12:00							21:37:00
			22:15:00							22:18:00
			22:18:00							23:03:00
			22:20:00							23:13:00
			22:28:00							23:59:00
			22:31:00							01:27:00
			22:37:00							02:32:00
			22:42:00							02:53:00
			22:57:00							03:48:00
			23:26:00							04:18:00
			03:15:00							04:50:00
			03:22:00							04:59:00
			19:29:00							21:13:00
			20:03:00							21:34:00
			20:28:00							21:38:00
			20:31:00							22:07:00
			20:36:00							22:17:00
			21:25:00							22:29:00
			21:36:00							22:53:00
			21:44:00							23:00:00
			23:41:00							20:03:00
			23:57:00							00:53:00
			00:55:00							03:30:00
			01:18:00							20:20:00
			01:23:00							20:22:00
			01:55:00							20:27:00
			02:05:00							20:38:00
			02:10:00							21:18:00
			02:13:00							23:26:00
			02:33:00							00:36:00
			03:19:00							04:02:00
			04:03:00							04:17:00
			04:55:00							04:35:00
			05:02:00							05:21:00
			05:08:00							20:21:00
			05:28:00							20:34:00
			05:36:00							20:40:00
			05:42:00							20:45:00
			05:46:00							20:54:00
			05:58:00							21:21:00
			23:57:00							21:38:00
			00:41:00							21:54:00
			03:03:00							22:13:00
			19:03:00							04:29:00
			20:05:00							05:11:00
			23:29:00							06:04:00
			02:32:00							20:19:00
			04:05:00							21:21:00
			05:38:00							20:24:00
			19:02:00							20:29:00
			20:02:00							20:31:00
			20:25:00							20:34:00
			20:27:00							20:43:00
			20:34:00							20:52:00
			20:38:00							21:07:00
			20:41:00							21:19:00
			21:04:00							21:37:00
			21:50:00							22:37:00
			22:01:00							03:25:00
			22:31:00							04:14:00
			22:40:00							04:19:00
			22:55:00							20:19:00
			23:03:00							20:21:00
			23:17:00							20:26:00
			00:16:00							20:29:00
			00:27:00							20:33:00
			00:32:00							20:37:00
			01:25:00							20:58:00
			02:19:00							21:05:00
			02:24:00							21:25:00
			02:36:00							22:01:00
			03:11:00							22:28:00
			03:14:00							22:53:00
			03:18:00							22:53:00
			03:35:00							23:27:00
			03:59:00							00:34:00
			04:36:00							00:41:00
			04:51:00							00:52:00
			05:07:00							02:18:00
			05:22:00							02:35:00
			05:28:00							05:21:00
			05:42:00							20:15:00
			19:01:00							20:27:00
			19:14:00							20:28:00
			19:17:00							20:36:00
			19:29:00							20:54:00
			19:42:00							21:24:00
			19:54:00							21:49:00
			20:05:00							22:21:00
			20:10:00							22:46:00
			20:16:00							03:56:00
			20:23:00							04:09:00
			20:50:00							05:31:00
			20:59:00							20:11:00
			21:07:00							20:15:00
			21:24:00							20:20:00
			21:57:00							20:25:00
			22:09:00							20:32:00
			22:11:00							20:39:00
			22:42:00							20:41:00
			23:08:00							20:52:00
			00:07:00							20:57:00
			01:08:00							21:04:00
			19:32:00							21:42:00
			19:20:00							21:47:00
			19:45:00							22:38:00
			19:49:00							23:28:00
			19:52:00							02:02:00
			20:28:00							02:43:00
			21:41:00							03:20:00
			22:10:00							03:31:00
			22:20:00							04:01:00
			22:39:00							04:21:00
			23:58:00							05:06:00
			00:16:00							20:19:00
			00:34:00							20:28:00
			00:56:00							20:31:00
			02:03:00							20:34:00
			04:54:00							20:46:00
			05:25:00							20:54:00
			05:29:00							20:57:00
			19:25:00							21:44:00
			19:27:00							21:55:00
			19:32:00							00:30:00
			19:35:00							01:11:00
			20:28:00							02:42:00
			21:41:00							04:21:00
			22:28:00							05:05:00
			22:48:00							05:17:00
			22:54:00							05:32:00
			23:09:00							05:38:00
			00:03:00							05:52:00
			00:26:00							20:21:00
			01:34:00							20:31:00
			01:47:00							20:35:00
			02:48:00							20:44:00
			03:14:00							20:59:00
			04:05:00							21:04:00
			04:07:00							21:06:00
			04:15:00							21:21:00
			04:46:00							21:29:00
			04:56:00							22:04:00
			05:02:00							22:42:00
			05:29:00							00:36:00
			20:43:00							00:54:00
			21:55:00							04:52:00
			23:52:00							05:25:00
			00:55:00							05:50:00
			04:09:00							20:18:00
			04:11:00							20:24:00
			04:13:00							20:38:00
			04:22:00							21:12:00
			04:36:00							21:47:00
			04:46:00							21:51:00
			04:51:00							22:12:00
			05:39:00							22:47:00
			19:57:00							02:55:00
			21:30:00							05:13:00
			21:53:00							05:26:00
			22:05:00							20:27:00
			22:37:00							20:30:00
			22:40:00							20:35:00
			23:03:00							20:46:00
			00:34:00							20:52:00
			00:42:00							20:56:00
			01:55:00							21:04:00
			02:11:00							21:27:00
			02:24:00							21:46:00
			02:40:00							22:12:00
			03:41:00							22:15:00
			04:05:00							23:24:00
			05:02:00							23:29:00
			05:05:00							00:23:00
			05:19:00							02:00:00
			05:36:00							03:58:00
			05:45:00							04:54:00
			18:51:00							04:59:00
			18:56:00							20:21:00
			18:58:00							20:23:00
			19:05:00							20:32:00
			19:11:00							20:52:00
			19:17:00							21:46:00
			19:20:00							22:10:00
			19:23:00							22:20:00
			19:25:00							23:53:00
			19:27:00							00:23:00
			19:39:00							00:49:00
			19:49:00							00:55:00
			19:56:00							02:38:00
			20:01:00							06:00:00
			20:53:00							20:18:00
			21:20:00							20:20:00
			21:48:00							20:23:00
			21:50:00							21:25:00
			22:23:00							21:53:00
			22:48:00							04:54:00
			23:40:00							05:16:00
			01:31:00							05:25:00
			02:46:00							05:54:00
			03:40:00							20:15:00
			03:45:00							20:20:00
			04:56:00							20:24:00
			05:22:00							20:32:00
			05:24:00							20:35:00
			19:57:00							20:41:00
			20:10:00							20:49:00
			20:49:00							20:51:00
			21:08:00							20:56:00
			21:49:00							21:05:00
			22:20:00							21:12:00
			23:14:00							21:36:00
			01:29:00							21:51:00
			01:33:00							22:00:00
			01:58:00							22:03:00
			02:04:00							00:36:00
			02:52:00							02:23:00
			02:56:00							03:35:00
			04:10:00							05:30:00
			04:34:00							20:19:00
			22:34:00							20:21:00
			22:41:00							20:25:00
			23:10:00							20:44:00
			00:29:00							21:21:00
			01:11:00							21:50:00
			04:09:00							00:29:00
			05:42:00							03:24:00
			19:56:00							03:52:00
			20:17:00							04:46:00
			20:54:00							20:23:00
			21:09:00							20:50:00
			21:24:00							21:12:00
			21:59:00							21:40:00
			23:34:00							21:47:00
			03:48:00							22:34:00
			19:24:00							01:13:00
			19:36:00							03:22:00
			19:52:00							04:07:00
			20:38:00							05:06:00
			21:10:00							20:10:00
			21:32:00							20:12:00
			21:43:00							20:14:00
			22:33:00							20:20:00
			22:36:00							20:24:00
			23:02:00							20:27:00
			23:12:00							20:39:00
			23:18:00							20:50:00
			23:32:00							21:25:00
			23:52:00							22:02:00
			00:29:00							00:53:00
			00:40:00							01:17:00
			00:49:00							03:27:00
			00:58:00							05:45:00
			01:08:00							06:05:00
			02:05:00							20:25:00
			03:21:00							20:28:00
			03:32:00							20:30:00
			03:50:00							20:37:00
			19:05:00							20:42:00
			19:13:00							20:46:00
			19:50:00							20:49:00
			20:45:00							21:26:00
			21:48:00							21:48:00
			00:49:00							03:15:00
			01:55:00							03:33:00
			02:15:00							03:50:00
			02:26:00							05:03:00
			05:10:00							05:52:00
			19:10:00							06:07:00
			19:16:00							20:19:00
			19:18:00							20:27:00
			19:25:00							20:38:00
			19:32:00							20:38:00
			19:38:00							20:47:00
			19:50:00							21:28:00
			20:01:00							21:33:00
			20:10:00							21:52:00
			20:20:00							22:03:00
			20:28:00							22:16:00
			20:44:00							22:47:00
			20:48:00							22:51:00
			20:51:00							00:38:00
			20:56:00							05:04:00
			21:17:00							06:01:00
			21:21:00							20:18:00
			21:30:00							20:21:00
			22:20:00							20:33:00
			22:28:00							20:34:00
			22:26:00							20:47:00
			23:20:00							21:20:00
			23:48:00							21:42:00
			23:58:00							21:52:00
			23:59:00							22:04:00
			01:03:00							22:18:00
			01:09:00							00:42:00
			01:12:00							03:39:00
			01:23:00							04:58:00
			02:02:00							05:43:00
			02:19:00							05:53:00
			02:25:00							20:11:00
			03:05:00							20:15:00
			03:30:00							20:21:00
			05:20:00							20:27:00
			05:23:00							20:30:00
			05:29:00							20:32:00
			19:11:00							20:35:00
			19:15:00							20:55:00
			19:20:00							21:09:00
			19:44:00							21:41:00
			20:24:00							21:50:00
			21:30:00							21:59:00
			21:34:00							00:50:00
			21:49:00							02:21:00
			21:54:00							04:10:00
			04:30:00
			05:35:00
			19:29:00
			19:39:00
			19:44:00
			19:55:00
			20:12:00
			20:24:00
			21:49:00
			21:55:00
			22:05:00
			22:36:00
			23:27:00
			23:57:00
			00:01:00
			00:43:00
			01:16:00
			01:22:00
			01:46:00
			02:08:00
			04:32:00
			19:33:00
			19:59:00
			20:14:00
			20:22:00
			20:33:00
			20:41:00
			20:48:00
			20:52:00
			22:30:00
			22:40:00
			23:10:00
			00:31:00
			00:34:00
			00:38:00
			01:17:00
			01:48:00
			02:03:00
			02:11:00
			02:49:00
			03:03:00
			03:34:00
			03:36:00
			04:14:00
			04:19:00
			04:21:00
			04:36:00
			18:59:00
			19:04:00
			19:07:00
			19:27:00
			19:38:00
			19:43:00
			19:50:00
			19:54:00
			20:39:00
			20:52:00
			21:13:00
			21:16:00
			21:19:00
			21:29:00
			21:34:00
			21:58:00
			22:22:00
			21:31:00
			22:37:00
			22:47:00
			22:49:00
			22:53:00
			23:53:00
			23:06:00
			23:12:00
			00:01:00
			00:23:00
			00:25:00
			00:36:00
			01:01:00
			01:12:00
			03:18:00
			04:12:00
			04:26:00
			04:43:00
			04:55:00
			05:14:00
			05:37:00
			21:34:00
			01:17:00
			19:15:00
			19:29:00
			19:39:00
			20:01:00
			20:15:00
			20:24:00
			20:53:00
			21:14:00
			21:40:00
			21:47:00
			22:30:00
			22:46:00
			23:28:00
			23:50:00
			00:48:00
			00:50:00
			01:01:00
			01:30:00
			02:25:00
			02:44:00
			03:05:00
			04:18:00
			04:21:00
			19:16:00
			19:30:00
			20:17:00
			20:51:00
			21:56:00
			22:43:00
			23:29:00
			23:47:00
			18:58:00
			19:29:00
			20:25:00
			21:14:00
			22:00:00
			00:16:00
			00:45:00
			01:03:00
			01:16:00
			01:26:00
			02:30:00
			03:32:00
			03:45:00
			04:18:00
